# Supplementary material for: Dorsal hippocampus mediates light–tone associations in male mice
Source: eLife. 2025 Dec 3;14:RP105863. doi: 10.7554/eLife.105863 (PMC12674615; doi:10.7554/eLife.105863)
Supplement: Source data 1. [file elife-105863-data1.xlsx]

## Sheet: Figure 1 
	PANEL B and C _ Left	drug	protocol	freezing_1	freezing_2	freezing_3	freezing_4	freezing_5	freezing_6	freezing_7	freezing_8	freezing_9	freezing_10	freezing_11	freezing_12	freezing_13	freezing_14	freezing_15	freezing_16	freezing_17	freezing_18	freezing_19	freezing_20	freezing_21	freezing_22	freezing_23	freezing_24	freezing_25	freezing_26	freezing_27	freezing_28	freezing_29	freezing_30	freezing_31	freezing_32	freezing_33	freezing_34	freezing_35	freezing_36		PANEL B and C _ Right	drug	protocol	OFF period	ON period
	% freezing	Paired	ptt	31.6	14.8	24.4	36.8	33.2	10	6.4	18.4	29.2	26.8	20.8	29.6	17.2	57.6	45.2	36	54	20.8	63.6	42.8	55.2	55.6	39.6	54	55.6	48.4	53.2	50.8	62	28.8	9.2	16.8	26.4	22.4	42	12.4		% freezing	Paired	ptt	28.4889	41.0536
		Paired	ptt	4.4	19.2	18	36.4	29.6	20.8	22	9.2	49.6	28.4	40.4	49.2	37.6	74	32.8	48.4	16.8	14	47.6	60.4	59.2	38.8	18	44.4	16	8.4	23.6	20.8	25.6	34.4	45.6	23.6	55.2	62	64	71.6			Paired	ptt	30.6	39.9644
		Paired	ptt	8	21.2	23.6	26	12.4	12	11.6	36.4	13.2	16.8	15.6	20	26.4	14.8	22.8	12.8	29.6	44.8	26.4	73.2	46.4	58.8	63.2	23.6	55.2	60.8	75.6	71.6	82	65.2	50.4	56.8	60.4	49.6	46.4	66			Paired	ptt	20.4444	57.3238
		Paired	ptt	3.6	11.6	21.6	22.8	7.6	26	8.4	17.6	9.6	7.6	24.4	12.4	25.6	20.8	15.2	28	28.4	42	8	50.8	36	34.4	33.2	20.8	63.2	36.4	56.4	34	46.4	44	26	10	25.2	14	50.4	34.4			Paired	ptt	18.5111	34.6521
		Paired	ptt	2.8	16	27.6	16.8	13.6	6.8	10.8	28.8	26.8	12	20.4	16.4	24	23.6	28	29.2	45.6	38.4	30	24.8	34.8	44	56	31.6	58.4	34	45.6	42.4	36.8	39.2	42.8	42	38	24.4	30.4	48.4			Paired	ptt	21.5333	39.0976
		Paired	ptt	6.8	8.8	57.6	15.2	18.4	18	11.2	10	10	20.8	14	14	21.6	28	32.4	21.6	34	40.4	28	33.6	32.8	52.8	39.2	60	72	51.2	44.4	64.4	65.2	67.2	52	44.8	38	13.2	14.4	40			Paired	ptt	21.2667	45.1878
		Paired	ptt	8	22.8	12.4	5.6	15.6	6	26.4	19.2	54	52	80	69.6	64.4	23.2	6.8	12.8	15.6	20	43.2	19.6	33.6	34.8	6.4	37.2	81.6	30.4	36.4	34.8	24.8	33.6	55.2	48	39.6	43.2	46.4	68			Paired	ptt	28.5778	39.8311
		Paired	ptt	1.6	6.8	26.4	15.2	10.8	11.2	24.4	58	74.4	61.6	76.8	66.8	60.4	70	72.4	69.6	12.4	27.2	32.8	12.8	40	39.6	20.8	36.8	40	45.6	40	35.2	81.6	80	65.2	77.2	43.2	52.4	36	22.4			Paired	ptt	41.4444	44.5432
		Paired	ptt	2.8	8.8	9.2	1.2	4.8	26	14.4	6.4	16.4	4.8	16	9.2	10.8	20.8	18	12.8	10.4	21.6	27.6	22.8	42.4	29.6	13.2	27.6	24.4	3.6	24.4	35.2	53.2	36.4	38.8	60.4	16.8	3.6	21.2	26			Paired	ptt	11.9111	28.184
		Paired	ptt	3.2	26.4	12	17.6	10	8	11.6	30.4	10.8	7.2	8.8	5.2	16.4	20.4	12	6.8	33.2	6.4	15.2	18.8	26.8	12.8	8	28.4	24.4	25.6	14	8.4	12.4	45.2	30	20.8	7.6	23.2	8.8	8			Paired	ptt	13.6889	18.8042
		Paired	ptt	0	31.2	22.4	33.6	16	20	60.8	16.8	14.4	19.6	46	8.8	26	4.8	12	14	66	35.2	40	14.8	13.6	45.2	40.4	16.4	36.8	49.2	52.4	8	16.4	16.4	23.6	26.4	34.8	14	29.6	15.2			Paired	ptt	24.8667	27.4061
		Paired	ptt	3.6	6.4	4.8	1.2	2.8	1.2	7.2	5.2	17.6	4.4	13.2	4.8	3.2	1.6	4.8	7.6	4.8	12.4	8	6.4	6.4	7.2	13.2	13.6	11.2	22.8	34	16.8	37.6	31.6	28	36.4	30.4	22	22.8	23.6			Paired	ptt	5.93333	20.6713
		Paired	ptl	22	34.4	8	14.4	13.6	5.6	27.2	14.8	17.6	3.6	44.8	20.4	39.6	14.8	11.2	10.8	14	10.8	37.6	95.6	100	69.6	89.2	90.4	65.6	86.8	87.6	98.8	64.8	98	86	89.6	5.2	22	33.6	26			Paired	ptl	18.2	69.2598
		Paired	ptl	0.4	22.8	14	5.2	8.4	17.6	24.4	5.2	28.8	10.4	28.8	34.4	14	33.2	40.4	17.2	37.2	73.2	78.8	87.6	80.8	72.8	98	93.6	71.6	75.6	91.2	87.2	48.4	75.2	84	57.6	68	98	45.6	85.2			Paired	ptl	23.0889	77.7506
		Paired	ptl	2.4	17.2	18.8	30.8	22.4	3.2	15.6	31.6	14	39.6	28.4	60.4	14.8	26	48.4	42	46	18.4	88.4	62.4	95.2	95.6	53.2	80.8	79.6	78.4	82	73.6	82.4	80	50.4	32.8	55.6	68.8	45.6	67.6			Paired	ptl	26.6667	70.7046
		Paired	ptl	2.8	8.8	26.8	18.4	20.4	5.2	20	23.2	28	4.4	16.8	7.2	7.6	17.2	19.2	16	24.8	13.6	79.6	99.2	57.2	88.4	78	96	79.6	62	96.4	80.4	69.2	50.8	93.2	76.8	74.4	65.2	83.6	85.2			Paired	ptl	15.5778	78.6397
		Paired	ptl	8.4	16.4	14.8	17.6	1.2	2.4	33.6	38	31.6	8.8	13.6	4.8	12	23.2	32	36.4	20.8	3.2	64.4	38.8	88.8	72.4	52	48.8	71.6	51.2	65.6	72	65.6	56	53.6	32	54	64	77.6	72			Paired	ptl	17.7111	61.1469
		Paired	ptl	10	14	25.6	48.8	15.6	2.8	34.4	14	23.2	20.8	14.8	18.4	20.8	34.4	20.8	21.2	21.2	66.4	70	80.4	94.8	98.8	99.2	99.6	82.4	68.4	74.4	82	85.2	75.6	84	87.2	89.6	79.6	79.2	88.8			Paired	ptl	23.7333	84.4188
		Paired	ptl	0	15.2	14	13.6	20	23.6	11.6	9.2	14.8	19.6	14.8	46	20.8	23.2	11.2	26.4	11.6	15.6	25.6	53.6	52.4	30.8	48.8	44	78.8	63.2	70.8	65.2	70.4	44.8	31.6	14.8	41.2	45.6	11.6	51.6			Paired	ptl	17.2889	46.9438
		Paired	ptl	2.8	12.4	27.6	14	27.6	20.8	11.6	20.8	13.6	69.2	28.8	60	57.6	68.4	51.2	61.2	73.2	84	68	99.6	99.6	100	81.2	92	99.2	87.6	94.4	37.2	76	72	82.8	90.4	87.2	90	64.4	51.2			Paired	ptl	39.1556	81.8404
		Paired	ptl	2.4	23.2	12	19.6	30	5.2	24	13.6	24	15.2	17.6	31.6	36.8	33.6	22	18	28.4	27.6	74	64	72	72.4	69.2	74.8	53.6	40.4	48.4	37.2	41.6	46	12.8	50.8	22.4	45.6	33.6	34.8			Paired	ptl	21.3778	49.6555
		Paired	ptl	2.4	12.8	27.6	8.4	18	9.2	10.4	10.8	18	5.2	29.6	31.2	26	18.4	12.8	44.4	47.2	60	66.4	69.2	74.8	86.8	66.4	93.2	74.4	70	7.6	41.2	31.2	76	58.4	71.2	65.6	20	30.8	25.6			Paired	ptl	21.8	57.1683
		Paired	ptl	0.8	20	19.6	8.4	16	4.8	11.2	14.4	10.8	16.4	15.2	22.4	9.2	5.6	13.2	8	10.4	31.6	61.2	36	78.4	33.2	76.8	84.8	12.8	48.8	2.4	44.4	44.4	27.6	22.8	10.4	0.8	24.4	29.2	27.2			Paired	ptl	13.2222	36.986
		Paired	ptl	0	8.4	22.8	24.4	14.8	10	13.6	11.2	18	10.8	15.2	16	20.4	15.6	4.8	19.6	18	12.8	46.4	79.6	85.6	61.6	77.6	27.2	46.4	46.8	40.4	28.4	18	30.4	21.2	26.8	19.6	7.6	24.8	42.4			Paired	ptl	14.2444	40.609
		Unpaired	ptt	0.4	5.6	24	11.2	6.8	27.2	9.2	29.6	50.8	28.4	32	36	36.4	16.4	22.4	10.8	5.2	11.6	51.2	50.4	40.4	29.2	29.6	29.2	21.2	14	40.8	33.6	28	18	33.6	22	25.6	25.2	29.2	42.4			Unpaired	ptt	20.2222	31.3181
		Unpaired	ptt	16	39.6	52.4	17.6	4.8	36.4	19.2	2.4	15.6	10	4	27.2	25.2	23.2	8.4	26	31.2	15.6	24.8	40	21.6	36	44	57.2	7.6	8.8	37.6	38.4	5.2	32	11.2	39.6	19.2	13.6	24	18.4			Unpaired	ptt	20.8222	26.6281
		Unpaired	ptt	31.2	18.4	26.4	15.2	13.2	13.2	44.8	26	29.2	6.8	24.8	62	8	35.6	21.2	18.4	20	19.2	33.2	22.4	26	26.4	28	30	32.4	16.8	27.2	30.4	42.4	54.4	76	38	42.8	20.8	15.6	34			Unpaired	ptt	24.0889	33.1629
		Unpaired	ptt	2.8	6.8	32.4	7.2	13.2	44.8	30.8	20	29.2	12.4	16.8	36.8	23.2	32.4	18.8	13.6	22.8	23.6	16.4	24.8	26	20.8	19.6	15.2	19.6	29.2	17.6	22.4	15.2	24	13.6	50.4	28.4	32	31.2	51.6			Unpaired	ptt	21.5333	25.4501
		Unpaired	ptt	2	46	37.6	62.8	65.2	24.8	11.6	36.4	27.2	34.8	54	54.4	14.4	4	18.8	25.2	9.6	21.2	21.6	32.8	10	18.8	20	29.6	34	24.8	27.6	31.2	48	13.2	66.8	48	50.4	52.4	11.2	34			Unpaired	ptt	30.5556	31.9182
		Unpaired	ptt	8	22.8	28.4	16.4	4.8	25.2	5.2	14.8	13.2	23.6	68.8	65.6	16.8	44.8	37.6	50	12.4	29.6	28.8	26.8	56	38	37.6	30.8	15.6	39.2	34	46.4	55.6	69.2	48.4	12.4	52	71.6	43.6	37.6			Unpaired	ptt	27.1111	41.3203
		Unpaired	ptt	6.4	16.4	48	25.2	22.4	19.2	14	33.2	28	53.6	55.6	48.4	67.6	64	40.4	21.2	16.8	41.2	20.4	28.8	34.8	10	20.8	27.6	25.6	17.6	14.4	42.8	23.6	28.4	38.4	19.2	20.4	36.8	43.6	55.2			Unpaired	ptt	34.5333	28.2507
		Unpaired	ptt	8.8	26.8	27.6	16	29.2	32.4	19.6	14	22.8	10.8	37.6	22.8	22	29.6	45.6	14.4	30.4	7.6	21.2	10.4	21.2	37.2	30	50.4	56	36.4	22	31.6	56.8	29.2	18.4	28.8	7.2	26.8	8	10			Unpaired	ptt	23.2222	27.8729
		Unpaired	ptt	7.6	6	10	11.6	7.2	5.2	11.6	20.8	10.4	16	49.6	17.6	13.6	26.4	4.4	8.8	50	46	22.8	20.8	18.8	14.4	21.2	29.6	12.8	32.8	16.4	10.8	35.2	31.6	44	24.8	25.2	16	42.8	16.4			Unpaired	ptt	17.9333	24.2498
		Unpaired	ptt	0.4	19.2	20.8	36.8	10	14	18.8	16.4	15.6	7.6	27.2	31.6	30	36	28	20.4	47.2	21.6	17.2	9.2	30.4	42.4	30	37.6	8.4	11.6	19.6	14	24.8	30.4	16.4	22.8	28.4	16.4	35.6	7.2			Unpaired	ptt	22.3111	22.3605
		Unpaired	ptt	8.8	12.4	12	6.8	35.2	21.2	11.2	27.6	23.2	21.2	36.8	37.6	29.6	36.4	18.4	24.4	16.8	17.2	20	37.6	31.6	38.8	22.4	17.2	22.4	23.6	21.2	38.4	46	36.4	35.2	20	39.2	11.2	20	45.2			Unpaired	ptt	22.0444	29.2509
		Unpaired	ptt	4	17.2	17.6	23.6	17.6	22	21.6	32.4	18.8	9.2	20.8	44.4	57.6	51.2	48.8	20.4	24.4	55.2	43.2	23.6	41.2	38	26.4	21.6	34	36	27.2	6.8	29.6	40.4	36	32	42.8	37.2	32.4	38.4			Unpaired	ptt	28.1556	32.6072
		Unpaired	ptl	10.8	34.8	17.6	22.4	14	27.6	12	14.8	66	54.8	53.6	42	33.6	14	18	32.8	10.8	24.4	39.6	79.2	86.8	82	95.6	75.2	90.4	36	67.2	57.2	86.4	70	38.4	57.6	36	67.6	64.4	54.8			Unpaired	ptl	28	65.8146
		Unpaired	ptl	19.6	20	11.2	27.6	10.4	23.2	11.6	14	16.4	6.8	8	12.4	16.4	14.4	16.8	8	14.8	40.4	57.6	96.8	75.2	73.2	84.4	84	76.4	83.2	21.6	42.8	76.4	37.6	30	68.4	45.2	7.2	4	16.8			Unpaired	ptl	16.2222	54.501
		Unpaired	ptl	11.6	10.4	9.2	14.4	4	34	22.8	32	22	40.4	25.6	50	55.6	36.8	18.4	42	33.2	10.4	31.6	39.6	76.4	43.6	67.6	38	88.4	66.8	41.2	79.2	50.8	66.4	23.6	24.4	34.8	36.4	42.4	40.8			Unpaired	ptl	26.2667	49.5666
		Unpaired	ptl	15.6	45.2	41.6	26	16.4	78.4	36.8	53.2	68.8	56.4	33.6	49.6	53.6	6.8	14.8	14.4	20.4	42	56.8	44.4	56.4	50	26.8	59.2	62.8	51.2	24	60	63.6	43.6	44.4	41.6	26.4	33.2	25.6	32.4			Unpaired	ptl	37.4222	44.5877
		Unpaired	ptl	0	44.8	57.6	47.6	74.8	64.8	61.2	67.2	80	59.6	64.4	57.6	60.8	18.8	18	22.8	4.8	43.6	41.2	57.6	85.2	76.8	83.2	90.4	52.4	87.6	78.8	90	88.4	79.2	74.8	75.2	77.2	33.2	79.2	71.2			Unpaired	ptl	47.1333	73.4385
		Unpaired	ptl	3.2	28.8	24.8	31.2	34	44.8	62.4	57.2	71.6	27.6	54.8	77.6	30.4	54.8	57.6	52.8	17.6	46.8	68	84.8	54	62.4	99.6	97.2	99.2	82.8	95.6	99.6	82.8	99.6	99.6	68	97.6	99.6	99.6	81.2			Unpaired	ptl	43.2222	87.3083
		Unpaired	ptl	5.2	18	20.4	8.8	10	10.8	6.4	11.6	14.4	13.2	34.4	20.8	46.8	38.4	13.6	50	17.6	37.6	60.4	97.2	99.6	97.2	80.4	64	69.6	64	27.6	33.6	27.6	36.8	34.4	35.6	13.6	54.4	64	40			Unpaired	ptl	21	55.5679
		Unpaired	ptl	1.6	23.6	30.8	21.6	22.4	21.2	11.6	14.4	36.8	18	58.8	46.4	35.2	46.4	37.2	16.8	27.2	43.6	71.2	79.6	96.8	70	75.2	63.2	82.4	62.8	80.8	70.4	83.6	71.2	84.4	83.2	60	92.4	90.4	84			Unpaired	ptl	28.5333	77.884
		Unpaired	ptl	29.2	42	12.8	29.2	28.8	12.8	20	36.8	22.8	31.6	49.2	50.4	22.4	31.6	24.4	28.8	50	40.8	36.8	87.2	54.8	63.2	73.6	69.2	69.6	92	61.6	19.6	12.4	44.8	22.8	25.6	26.8	29.6	27.6	4			Unpaired	ptl	31.3111	45.6324
		Unpaired	ptl	0	16	28	60.8	29.2	15.2	15.6	22.4	10.8	5.6	31.2	34	40	68.8	42.4	49.6	41.6	58.4	63.6	70.8	89.6	93.6	66.8	89.2	88.4	62.8	83.6	31.6	63.2	80	60.8	72.4	70	61.6	72.4	32.8			Unpaired	ptl	31.6444	69.6377
		Unpaired	ptl	3.2	25.6	49.6	10.8	18.8	1.6	34.4	9.2	32.8	18.8	26.4	17.6	36.8	21.6	4	16.8	47.6	61.6	67.6	82	94.4	28	54.4	78	28	76.4	47.2	24	48.8	14.4	34.4	27.2	17.2	31.2	41.2	28.8			Unpaired	ptl	24.2889	45.7435
		Unpaired	ptl	26.4	15.2	24.8	22.8	19.2	23.2	35.2	34	33.2	37.6	67.6	70	43.6	36.8	27.6	40	48.8	27.6	50.4	76.4	97.6	64.4	65.6	58.4	83.6	50.8	81.6	16	57.2	43.2	14.8	14	43.2	30.8	37.6	43.6			Unpaired	ptl	35.2	51.6337
		No-Shock	ptt	0	4.4	16	23.2	26	10	10.8	11.2	23.2	15.6	18.4	18.4	9.6	4.4	7.6	13.2	26	20.8	10.4	6	13.6	8	20	10.8	11.6	5.2	18.8	16.4	37.2	4.8	12.4	6.8	18.8	25.6	20	18.8			No-Shock	ptt	14.3778	14.7366
		No-Shock	ptt	0.8	7.6	6.8	5.6	22.8	26.8	14	8	18	17.2	8.4	8.8	12	10	2.8	8.4	8.4	14.4	17.2	14.8	6.8	27.2	2.4	13.2	7.2	29.2	31.6	13.6	13.6	17.6	12.8	8	27.6	14.4	11.6	22			No-Shock	ptt	11.1556	16.1591
		No-Shock	ptt	14	14	18.8	5.2	4.8	14	4.4	6.8	19.2	10	4.8	8	12.4	10.4	6.4	4.8	12	11.6	11.6	6.8	8	21.2	32	10	10.4	7.2	9.6	3.6	17.2	10.8	11.6	6.4	14.4	16	30	15.6			No-Shock	ptt	10.0889	13.4697
		No-Shock	ptt	0	15.6	4.4	7.2	2	4	6	6.4	6.8	7.6	6.4	6	10.4	13.2	4.8	6.8	0.8	13.2	21.2	2	12	9.2	9.6	14	10.8	6.8	4.4	7.6	6.4	4.4	10.4	20.8	14.4	16	5.2	7.6			No-Shock	ptt	6.75556	10.1578
		No-Shock	ptt	3.6	4.8	13.6	3.2	5.2	6	4	5.6	3.6	17.6	6.8	15.2	0.8	3.2	9.2	8.8	13.2	6.4	8	14.8	6.4	4.4	5.6	14	2.8	8.4	4	5.2	13.6	12	22	3.6	2	23.2	8	5.2			No-Shock	ptt	7.26667	9.06868
		No-Shock	ptt	8.4	10	4.4	17.2	16.4	5.2	5.6	14	14.8	10.8	5.2	9.6	16	22.4	34.8	14	14	8.4	19.2	12.8	18.4	20.4	9.2	18	6.8	17.2	12.8	13.6	14	23.2	19.6	15.6	31.6	23.6	46.8	22.8			No-Shock	ptt	12.8444	19.2043
		No-Shock	ptt	5.2	24.8	22.8	30	26	21.2	42	16	13.2	28	20.8	29.6	11.2	19.2	21.6	5.6	4.8	12	8.8	15.2	5.2	14	5.6	35.6	23.2	22.4	9.2	15.6	17.6	6.4	14.8	20.8	42.4	23.6	9.2	25.6			No-Shock	ptt	19.6667	17.515
		No-Shock	ptt	0.8	27.6	7.2	5.6	19.6	6	9.2	3.6	2	9.2	44	16.4	24.8	15.6	22.8	8	7.6	18	6.4	15.6	3.6	14.8	21.6	16.8	20.4	17.2	7.6	7.2	8	4.4	3.6	24.8	30.4	14.4	10.8	14.8			No-Shock	ptt	13.7778	13.4697
		No-Shock	ptt	4	10.4	10.8	8.8	17.2	4	4.4	2	12	10.4	22	0.8	24.4	4.8	36.8	16.8	32.8	30	5.2	35.6	32.8	20	19.2	31.6	22	29.2	26.8	18.4	38.8	27.6	16	28	11.2	13.2	40.8	16.8			No-Shock	ptt	14.0222	24.072
		No-Shock	ptt	0.8	2.4	8.4	1.6	1.6	2.4	6	8	24.4	4.4	9.2	2.4	3.2	17.2	4.4	16	5.6	9.2	7.6	10	24.8	6.4	8.8	12.8	18.8	8.8	6	14	2.8	14.4	9.2	5.2	12	10	12.8	16.4			No-Shock	ptt	7.06667	11.158
		No-Shock	ptt	2	16	22.4	2.8	9.6	6.4	8	15.6	9.6	4	13.2	22.8	8.4	10.4	11.6	4.8	4	14.8	6.4	12.4	19.6	22.8	17.2	16.4	10.8	8.8	8.4	18.8	27.6	2.4	8.8	7.2	26.4	8	38.4	9.6			No-Shock	ptt	10.3556	15.0033
		No-Shock	ptt	0	4.4	5.6	6	10.8	9.6	38	4.4	26	10	4.4	7.2	2.8	21.6	22.4	16.8	32.4	4.4	1.6	5.2	10.4	22	20	35.2	14.4	16.8	28	31.6	14.4	13.2	16	9.6	18.8	4.4	9.2	31.6			No-Shock	ptt	12.6	16.8037
		No-Shock	ptl	10.4	24.8	23.2	15.6	14	13.6	9.6	24.8	8	8	7.6	21.2	26.8	17.6	13.6	7.2	18.8	8	13.2	19.6	32	38.4	19.6	34	48	15.2	12.8	37.2	26.4	16.4	10.4	6.8	10	8	41.2	34.8			No-Shock	ptl	15.1556	23.5608
		No-Shock	ptl	2	15.2	22	22.8	16.8	61.2	46.8	36	20.8	12	2	18.4	18.4	54.4	72.8	38	31.2	14.4	21.2	26	4	5.6	4.4	37.2	24.8	49.2	30.8	65.6	82	72.8	56	17.6	24	36	54.4	17.2			No-Shock	ptl	28.0667	34.9411
		No-Shock	ptl	2	10	11.2	4.4	4.4	6.8	8.4	5.2	11.2	17.2	6	8	14.8	8.4	17.6	12.4	8.4	14.8	10.8	9.6	48	28.8	2.4	20.8	22	17.6	3.6	30	13.6	4.8	20	6.4	8.4	15.2	49.6	39.6			No-Shock	ptl	9.51111	19.5154
		No-Shock	ptl	5.2	32.4	10.8	11.6	10	21.2	11.2	6	13.2	10.8	2.8	16.8	19.6	10.4	15.6	18.4	19.6	13.2	10	28	18.4	4.8	6.8	17.2	9.2	22.4	20	30.8	8	26.4	8	11.6	15.6	7.6	13.6	10			No-Shock	ptl	13.8222	14.9144
		No-Shock	ptl	13.2	18	10.8	8.4	19.6	19.6	9.6	16.4	12	3.2	8.4	4	6.4	9.6	4.8	13.2	10.4	23.2	10.8	22.4	7.2	7.6	16.8	22.8	20.4	23.2	14.4	21.2	26	6	13.6	8.8	15.6	18	8	4.8			No-Shock	ptl	11.7111	14.87
		No-Shock	ptl	4	8.8	10.8	8	5.2	8.8	12.8	20.4	36	31.2	9.2	14.8	9.6	26.4	9.6	18.4	9.2	18.4	15.6	7.2	16.8	26.4	54.8	26.8	9.6	14.4	16.4	16.8	22.4	24.4	19.2	41.6	36.4	48	32.8	26.4			No-Shock	ptl	14.5333	25.339
		No-Shock	ptl	10	24	21.6	26	22	20.4	17.2	7.6	6.4	17.6	20.4	14.8	10	10	6.8	15.2	11.6	13.2	10.8	24.4	7.6	6.4	15.6	10.8	12	20	20.8	26.8	22.8	25.6	12	10.4	20.4	24.4	14	19.2			No-Shock	ptl	15.2667	16.8926
		No-Shock	ptl	0	23.6	35.6	20.8	26.4	12	26	5.6	15.6	14	5.2	21.6	30	18	8.8	27.6	10	4.4	12	18.8	20.8	35.2	39.6	13.2	22.4	13.6	5.2	16	10	20.4	18.8	26.8	17.6	20	31.2	23.6			No-Shock	ptl	16.9556	20.2934
		No-Shock	ptl	4.4	5.2	5.6	2	17.6	10.8	17.6	21.2	13.6	10.4	17.6	46	36	22.8	6.4	5.2	12.8	14.4	7.2	12.8	38	21.6	39.2	20.4	3.6	9.6	23.6	18.8	27.6	27.2	15.2	27.2	16.4	13.2	20	14.4			No-Shock	ptl	14.9778	19.7822
		No-Shock	ptl	9.6	9.2	2.8	20.8	3.6	2	5.2	10.4	9.2	2.4	7.2	10.4	5.6	13.6	4.4	26.4	10	25.2	46.4	12	12.8	29.6	3.6	31.6	15.6	16	10.8	11.6	14	26	19.2	14.4	3.2	25.2	33.6	41.2			No-Shock	ptl	9.88889	20.3823
		No-Shock	ptl	8	4.4	3.6	6	7.6	17.2	15.6	8	8.4	8.4	16.8	12.4	8.8	6.4	6.8	5.2	14	7.6	20.4	22.8	15.2	13.6	6	10	15.2	17.2	12	14.4	22.8	20	17.2	14.4	19.2	11.2	14.4	18.4			No-Shock	ptl	9.17778	15.8035
		No-Shock	ptl	0	15.6	4	15.6	4.8	19.6	12.8	18.4	8	26.4	18.4	15.2	8.4	31.2	11.2	9.6	6	36.8	8.8	17.6	17.6	2	5.2	6	5.2	14.8	25.6	19.6	11.6	22.8	33.2	22	17.6	4	23.6	32.8			No-Shock	ptl	14.5556	16.1147

## Sheet: Figure 2 
Panel D	Photometry
sensor	site	diffs
GCaMP	dHPC	2.87477
GCaMP	dHPC	3.05317
GCaMP	dHPC	2.21795
GCaMP	dHPC	1.97742
GCaMP	dHPC	1.52229
GCaMP	dHPC	2.63166
GCaMP	dHPC	2.83288
RCaMP	dHPC	2.94271
RCaMP	dHPC	2.92411
RCaMP	dHPC	1.59964
RCaMP	dHPC	1.12905
RCaMP	dHPC	3.02776
RCaMP	dHPC	2.19781
GCaMP	vHPC	2.80259
GCaMP	vHPC	1.4586
GCaMP	vHPC	1.71652
GCaMP	vHPC	2.83074
GCaMP	vHPC	1.86072
GCaMP	vHPC	1.81036
GCaMP	vHPC	2.1175
GCaMP	vHPC	1.962
RCaMP	vHPC	0.939816
RCaMP	vHPC	0.606586
RCaMP	vHPC	1.55413
RCaMP	vHPC	2.26241
RCaMP	vHPC	1.22437
RCaMP	vHPC	2.13026
RCaMP	vHPC	2.3816
RCaMP	vHPC	1.94002

## Sheet: Figure 3
Panel D	Photometry			Panel E	Photometry
sensor	site	diffs		sensor	site	diffs	subtask
GCaMP	dHPC	4.60963		GCaMP	dHPC	5.62276	pc1
GCaMP	dHPC	2.88951		GCaMP	dHPC	5.01023	pc1
GCaMP	dHPC	3.71383		GCaMP	dHPC	3.75662	pc1
GCaMP	dHPC	3.58235		GCaMP	dHPC	0.583685	pc1
GCaMP	dHPC	3.55521		GCaMP	dHPC	7.7365	pc1
GCaMP	dHPC	2.45153		GCaMP	dHPC	6.79707	pc1
GCaMP	vHPC	3.683		GCaMP	vHPC	4.13851	pc1
GCaMP	vHPC	3.61012		GCaMP	vHPC	3.04905	pc1
GCaMP	vHPC	4.77923		GCaMP	vHPC	1.71609	pc1
GCaMP	vHPC	4.14005		GCaMP	vHPC	0.714944	pc1
GCaMP	vHPC	2.94611		GCaMP	vHPC	3.63464	pc1
GCaMP	vHPC	4.31918		GCaMP	vHPC	3.65149	pc1
				GCaMP	dHPC	3.94139	pc2
				GCaMP	dHPC	2.61456	pc2
				GCaMP	dHPC	2.34143	pc2
				GCaMP	dHPC	2.94136	pc2
				GCaMP	dHPC	2.5831	pc2
				GCaMP	dHPC	3.11375	pc2
				GCaMP	vHPC	2.46586	pc2
				GCaMP	vHPC	1.83701	pc2
				GCaMP	vHPC	1.13942	pc2
				GCaMP	vHPC	5.64834	pc2
				GCaMP	vHPC	3.90393	pc2
				GCaMP	vHPC	11.1841	pc2
				GCaMP	dHPC	2.48226	pc3
				GCaMP	dHPC	0.637103	pc3
				GCaMP	dHPC	2.83212	pc3
				GCaMP	dHPC	3.45936	pc3
				GCaMP	dHPC	3.00427	pc3
				GCaMP	dHPC	4.03878	pc3
				GCaMP	vHPC	5.11041	pc3
				GCaMP	vHPC	5.01643	pc3
				GCaMP	vHPC	2.56463	pc3
				GCaMP	vHPC	2.18959	pc3
				GCaMP	vHPC	4.21696	pc3
				GCaMP	vHPC	0.800138	pc3
				GCaMP	dHPC	3.73074	pc4
				GCaMP	dHPC	3.27635	pc4
				GCaMP	dHPC	3.6331	pc4
				GCaMP	dHPC	3.40386	pc4
				GCaMP	dHPC	3.69035	pc4
				GCaMP	dHPC	2.5597	pc4
				GCaMP	vHPC	14.5272	pc4
				GCaMP	vHPC	5.00667	pc4
				GCaMP	vHPC	3.6961	pc4
				GCaMP	vHPC	3.78533	pc4
				GCaMP	vHPC	-0.30116	pc4
				GCaMP	vHPC	1.62385	pc4
				GCaMP	dHPC	1.32673	pc5
				GCaMP	dHPC	2.72823	pc5
				GCaMP	dHPC	3.1856	pc5
				GCaMP	dHPC	3.5148	pc5
				GCaMP	dHPC	3.00269	pc5
				GCaMP	dHPC	7.81588	pc5
				GCaMP	vHPC	1.81409	pc5
				GCaMP	vHPC	3.69144	pc5
				GCaMP	vHPC	6.32338	pc5
				GCaMP	vHPC	2.65144	pc5
				GCaMP	vHPC	5.33343	pc5
				GCaMP	vHPC	3.67648	pc5
				GCaMP	dHPC	1.82687	pc6
				GCaMP	dHPC	1.70684	pc6
				GCaMP	dHPC	2.91397	pc6
				GCaMP	dHPC	4.87829	pc6
				GCaMP	dHPC	3.5124	pc6
				GCaMP	vHPC	1.63921	pc6
				GCaMP	vHPC	3.24218	pc6
				GCaMP	vHPC	3.11811	pc6
				GCaMP	vHPC	6.98121	pc6
				GCaMP	vHPC	7.39268	pc6

## Sheet: Figure 4
	PANEL B and D _ Left	protocol	drug	brain	freezing_1	freezing_2	freezing_3	freezing_4	freezing_5	freezing_6	freezing_7	freezing_8	freezing_9	freezing_10	freezing_11	freezing_12	freezing_13	freezing_14	freezing_15	freezing_16	freezing_17	freezing_18	freezing_19	freezing_20	freezing_21	freezing_22	freezing_23	freezing_24	freezing_25	freezing_26	freezing_27	freezing_28	freezing_29	freezing_30	freezing_31	freezing_32	freezing_33	freezing_34	freezing_35	freezing_36		PANEL B and D _ Left	protocol	drug	brain	OFF period	ON period
	% freezing	ptt	DPC	d	15.2	8	27.2	32	23.2	26.8	16.8	46	17.6	16	8	13.2	18.8	24.8	14.4	17.2	27.2	56	11.6	32	52	48	8.4	19.6	28.8	23.2	25.6	53.6	32.4	26.8	24.8	32.4	60.8	41.2	26	25.2		% freezing	ptt	DPC	d	22.6889	31.8071
		ptt	DPC	v	5.2	29.6	17.6	15.2	2.8	10.4	17.2	23.2	31.6	24.8	16.8	36.4	30.8	30.4	56	60	65.6	57.2	43.6	66	58	56.4	58	44.8	29.2	22	6	28.4	23.2	40.4	49.6	70	56.8	43.6	55.2	57.6			ptt	DPC	v	29.4889	44.9433
		ptt	DPC	v	29.2	23.6	59.2	61.2	72.4	72.4	30.8	57.6	21.2	26.4	26.8	49.6	72.8	38.8	68.8	55.6	22.4	60	45.6	70.8	49.2	81.2	62	28	7.2	50.4	36	38.8	61.6	13.6	26.4	50.4	36.4	81.2	68.4	57.2			ptt	DPC	v	47.1556	48.0329
		ptt	DPC	d	26	46	49.2	20	34.4	44	36.4	66.8	38.8	33.6	33.6	49.2	36	45.6	40.8	35.2	31.6	64	68	40.8	30.4	34.8	79.6	57.2	73.2	38.8	35.2	50	49.2	30	21.6	24.8	42.8	30.4	49.2	35.2			ptt	DPC	d	40.6222	43.9653
		ptt	DS	d	6.4	38.8	14.8	45.2	14.8	14	39.6	31.2	6	38	39.6	24.8	5.2	22.4	19.6	11.6	1.6	32.4	26.8	17.6	20.8	10	50.4	25.2	19.2	12.4	30	26	17.6	29.6	15.6	10	10.8	6	13.2	28.8			ptt	DS	d	22.5556	20.5601
		ptt	DS	d	10.8	56.8	18.8	20	18.4	16	15.6	22	24.4	38	20	34.8	38.4	60.4	75.2	41.6	49.2	17.6	38.8	57.2	42.4	41.2	51.2	10.4	29.6	47.2	61.2	50.4	49.6	46.4	48	50.4	16	47.6	34.8	29.6			ptt	DS	d	32.1111	41.7871
		ptt	DS	v	0	34.4	13.2	6.8	12.4	32	36	47.6	31.2	19.2	8.4	11.2	31.2	28.4	14.8	23.6	12.4	22.8	11.6	45.6	37.2	23.6	39.6	37.6	17.6	19.6	23.6	19.6	30.8	11.2	20.4	54.8	56.4	50.4	48	15.2			ptt	DS	v	21.4222	31.2736
		ptt	DS	v	2.4	25.6	16.4	24.8	6.4	12.8	18	28.4	14	14	47.2	18.4	31.6	28.4	15.2	11.2	11.6	13.6	36.8	20.8	29.6	11.6	19.2	25.2	29.6	19.2	52.4	38	23.2	20.4	16.4	7.6	19.2	15.2	42.8	33.6			ptt	DS	v	18.8889	25.6057
		ptt	DPT	d	2.8	14.8	12	22.8	10	31.6	27.2	22.4	18	21.2	58.4	34	54	20.4	28	11.6	59.2	36.8	46	35.6	50	46.8	49.2	40.8	29.2	15.6	41.2	47.6	33.6	30	56.8	52	49.2	64.8	22.8	39.6			ptt	DPT	d	26.9556	41.7204
		ptt	DPT	v	0	2.8	4.8	12.4	1.2	0.4	3.2	3.6	4	6.8	10.4	12.8	23.2	41.2	11.2	16	6.8	4.4	15.6	11.6	31.2	28.4	8	22	28.8	49.6	21.2	22.4	48.8	18.8	24	20.8	16.8	39.2	42.8	16.4			ptt	DPT	v	9.17778	25.9169
		ptt	DPT	v	6.8	27.2	5.2	12.4	23.6	34	30	6.8	13.2	21.6	8.4	20	28.4	45.2	26	11.2	16.8	16.4	34.4	33.2	37.2	22	30.4	17.6	31.2	24.4	33.6	30	33.6	20.8	14.4	40.8	56	19.6	21.2	18			ptt	DPT	v	19.6222	28.8064
		ptt	DPC	d	8	44	24.8	23.6	9.6	19.2	21.2	9.2	58	26.8	22.8	21.6	39.2	45.6	38	21.2	29.2	39.2	19.6	33.6	28.4	48.4	70	56.4	46	50.4	38.4	59.6	34.8	68.4	60.4	11.2	37.2	59.6	14.4	37.2			ptt	DPC	d	27.8444	43.0096
		ptt	DPC	v	5.6	17.2	41.6	10.4	26.8	16.8	42	16.4	29.6	22.8	47.6	21.2	40	35.6	13.2	15.6	16	12	21.6	56	47.2	32.8	22.8	20.8	26.8	35.2	46.4	50	42.4	33.6	42.8	19.2	40.4	41.6	7.2	13.2			ptt	DPC	v	23.9111	33.3407
		ptt	DPC	v	16.4	30	36	64.4	69.6	16.4	15.2	26.8	20	28.8	21.2	52.4	37.2	20.4	41.2	27.6	62	66.8	73.2	38	70.8	82.8	76.4	55.6	64	36.4	51.2	39.6	62.4	27.2	9.2	59.2	58.8	24	23.2	60.4			ptt	DPC	v	36.2444	50.7002
		ptt	DPC	d	6	8.8	16.4	5.6	5.2	21.2	26.8	10.4	10.4	22.8	50	35.2	32	22.4	20	11.6	23.6	14.4	5.2	11.6	23.2	16	25.6	10.4	23.6	17.2	18.4	17.2	12	16.4	36	32	16	24.4	16.4	12.4			ptt	DPC	d	19.0444	18.5597
		ptt	DPC	d	0	48	72	82.8	48.8	69.2	36.8	8	13.2	44.4	32	50.8	78	35.2	48.8	15.6	30.4	52.4	74.8	22	57.6	84.4	80.4	40.4	7.2	12.8	26.4	14.4	4	8.8	14	10.4	22	24.8	22	11.6			ptt	DPC	d	42.5778	29.8955
		ptt	DPT	v	0	1.2	2.4	14.8	34	8	11.6	7.2	20	18	24.4	48.4	32.4	46	58.8	28.8	22.8	25.2	37.6	9.6	19.6	32.4	19.2	23.2	10.4	31.2	12	22	16	17.6	32.8	13.2	15.2	12.8	22.8	24.8			ptt	DPT	v	22.4444	20.6935
		ptt	DPT	v	1.6	6.4	5.6	23.2	12	14.8	31.2	8	19.2	32	7.2	45.2	18.4	28.8	40.4	28.4	24	8.4	45.2	39.2	34.8	41.2	29.6	53.2	31.6	29.2	42	44.4	34	58.4	66.4	32	32.4	14.4	16.8	27.6			ptt	DPT	v	19.7111	37.3639
		ptt	DPC	d	17.2	3.6	34.4	33.2	38.4	27.2	37.2	42.4	20	39.6	16	20.4	28.8	21.6	18.8	36.4	15.2	33.2	46.4	40	46.8	44.4	32.8	51.6	49.6	44.4	48.8	39.2	24.8	26.4	34	27.2	20.8	28.8	13.2	28.8			ptt	DPC	d	26.8667	36.008
		ptt	DPT	d	25.2	70	13.6	5.2	16.8	12.4	26	20.8	12.8	8.8	32	20.8	50.8	44	58.8	51.6	42.4	46	26.4	56.4	37.2	18.8	40	24.8	35.6	51.2	44.4	26	22.8	18.4	14	18	41.2	46	42	68.4			ptt	DPT	d	31	35.0967
		ptt	DPT	d	29.6	55.2	28.4	51.2	13.6	18.4	12.4	42	42	17.2	26	24.8	16.4	36.4	12	16.4	16.4	18	16.8	14.4	18	23.6	25.2	13.2	23.6	30.4	17.6	12.4	32	28.4	54	46	54.4	66	47.6	68			ptt	DPT	d	26.4667	32.874
		ptt	DPT	v	1.2	18	34	25.6	37.6	48	11.2	24.8	38.4	47.2	7.6	25.2	25.6	28.4	56.8	49.2	50.8	30	20	21.2	44	36	52	39.2	44.4	25.2	55.6	51.2	25.6	29.6	41.6	27.2	58	42	45.6	36.8			ptt	DPT	v	31.0889	38.6308
		ptt	DPT	v	24.8	6.4	20.4	10	62.4	37.6	55.2	47.6	13.6	14.8	15.6	19.2	36.4	16.4	36.8	40.8	39.2	31.6	37.6	21.2	50.4	27.2	71.6	37.2	53.6	53.6	37.2	67.2	35.6	10.4	38.8	37.6	40.8	11.2	35.6	16.4			ptt	DPT	v	29.3778	37.964
		ptt	DPC	d	4.4	13.6	28.8	59.2	8.8	12.4	24	38.4	38	27.6	43.2	31.6	20.8	15.6	13.6	32.4	42.8	19.6	24.4	26.4	6.4	20.8	26	26.8	25.6	20.8	56	62.4	17.6	20.8	44	33.6	34	49.2	28	16			ptt	DPC	d	26.3778	29.94
		ptt	DPC	v	2	9.6	12	16	1.6	20.8	18.8	12.4	10	9.2	17.6	2.4	17.2	25.6	12.4	33.2	20.4	35.2	36.8	11.2	22	11.6	32.8	14.4	15.6	54	18	46	37.6	50.4	28.8	30	20.4	30.8	18	17.2			ptt	DPC	v	15.3556	27.5395
		ptt	DPC	v	1.6	38	21.6	12.8	38.4	10.4	27.2	16.4	15.2	24.8	9.6	21.2	28.8	40	52	74.8	45.6	38.4	33.2	51.6	62.4	63.2	66.8	37.6	55.2	44	20.8	31.2	23.6	45.6	53.6	16.4	56	20.8	46.4	33.6			ptt	DPC	v	28.7111	42.3427
		ptt	CS	d	3.2	11.2	24.8	14.8	11.6	4.8	12.8	11.6	14.8	14.8	5.6	42.8	19.2	25.2	9.2	18.4	24.4	38.8	14.8	22.8	12	24.8	6	54.8	43.6	46	17.6	12.4	31.2	18.4	48	49.2	26.8	66	37.2	28			ptt	CS	d	17.1111	31.0958
		ptt	CS	v	17.2	20	48	53.2	33.6	18	31.6	35.2	41.6	62.8	35.6	62.8	31.2	42.8	8.8	39.2	24.8	49.6	26	40	31.6	24	27.6	17.2	52.4	67.2	24.8	33.6	27.2	53.6	45.6	46.4	54.4	62	38.4	34.8			ptt	CS	v	36.4444	39.2754
		ptt	CS	v	9.6	29.6	8	12.8	10.8	17.2	14.4	36.4	15.6	14.4	36.8	52.4	61.2	14.4	41.6	46.8	31.2	13.6	22.4	41.6	65.6	70	41.2	64	91.6	83.2	47.6	24	43.6	52	73.6	20.4	26.4	30.8	31.6	52			ptt	CS	v	25.9333	48.9887
		ptt	CS	d	18	20.4	28.4	48.4	36.4	23.6	28.8	35.2	31.2	36.8	60	50	11.6	32	35.6	50	21.2	23.2	36	36.8	37.6	38.4	74	42	46.4	20	40	52	51.6	35.6	69.6	63.2	60.8	16	48.8	34.8			ptt	CS	d	32.8222	44.6544
		ptt	DS	d	12.8	2.8	7.2	7.6	1.2	6	6.8	8	17.6	14.8	21.6	22.8	30.8	20.8	14	54.4	18.8	26.4	8	40.4	30.4	57.2	64.4	45.6	57.2	9.2	34.8	13.6	27.2	30	6.8	4.8	23.2	20	15.2	4.4			ptt	DS	d	16.3556	27.3616
		ptt	DS	v	4.4	15.2	28	17.6	15.2	15.6	29.2	25.6	45.2	29.6	34.4	16.8	15.2	18.4	21.2	9.6	30.8	27.6	16	28	33.2	10	19.2	10.4	20.8	7.6	41.2	24.4	22	36	18	21.2	27.6	32.4	18.4	29.2			ptt	DS	v	22.2	23.094
		ptt	CS	v	0	16	14	35.6	31.6	11.2	5.6	28.8	36	28.4	38.8	40.8	12.8	33.6	67.6	24.8	24.4	18.8	32	20.4	33.6	42.4	35.2	53.2	12	16	20.4	13.2	10.8	46	22.8	32.4	13.2	8.4	26.4	3.2			ptt	CS	v	26.0444	24.5388
		ptt	CS	d	0.8	2	2	11.2	14.4	3.6	5.2	10.4	3.6	7.6	12.4	6.4	8.4	10	16.4	12.4	30	4	4.4	25.6	8.4	44.8	50.4	15.2	14	25.6	14.8	30	42.4	53.2	9.6	40.4	38	53.2	38	9.6			ptt	CS	d	8.93333	28.7619
		ptt	CJ60	d	8	8.8	20	7.2	15.6	17.2	18.8	16.8	6.8	14.8	18	8.8	4.8	22	24	26.4	12	15.6	21.2	3.2	6.4	23.6	11.2	16.8	66	21.6	11.6	18.4	11.2	18.8	16	22.8	8	20.4	28.4	16.8			ptt	CJ60	d	14.7556	19.0265
		ptt	CJ60	d	0	28.8	16	13.2	4.4	24.8	14	41.2	8.4	13.6	15.6	28	27.2	32	28	14.8	13.6	19.2	4.4	14	4.4	10.8	34.8	35.2	39.6	29.2	21.6	31.6	47.2	52	24	20.4	23.6	28.4	32	13.6			ptt	CJ60	d	19.0444	25.9391
		ptt	CJ60	v	5.6	19.2	12.4	8.4	34.8	12.8	19.6	11.6	24.4	20.4	21.2	62.4	46.8	43.2	44.4	48.4	54.4	18.4	28.4	16.4	30	28.4	53.6	27.2	65.6	41.2	2.4	19.6	23.6	41.2	14	23.6	23.6	31.6	10.4	24			ptt	CJ60	v	28.2444	28.0507
		ptt	CJ60	v	4.4	18.4	21.6	10	18	2	4.8	11.6	20.4	5.2	16	26.4	20.8	36.4	14	27.2	18.4	33.6	9.2	26	30.4	25.6	40.4	29.2	22.4	22.8	6.4	6.8	6	23.2	18.4	21.6	16.4	17.6	16.4	6			ptt	CJ60	v	17.1778	19.1598
		ptt	CJ60	d	2	27.2	30	16	9.2	13.2	22.4	17.2	8	18	37.2	15.2	21.2	5.2	26.4	42.8	32.4	8.4	29.6	14.4	18.8	22.4	27.6	43.2	20	19.2	42	11.6	12.4	2	11.6	50	19.6	45.2	11.6	23.2			ptt	CJ60	d	19.5556	23.583
		ptt	CJ60	d	1.6	14	11.2	13.6	9.2	4.8	20.8	5.6	11.6	21.2	33.2	6.4	28	19.2	14.4	27.6	20.4	34.8	33.6	53.2	54.4	26.8	25.2	25.2	31.6	18	9.2	5.2	2.8	27.6	29.6	35.2	22.8	28	46.8	45.2			ptt	CJ60	d	16.5333	28.9175
		ptt	CJ60	v	4.4	19.2	36	21.2	22	24.4	16.4	42	24.8	54.4	17.6	16	27.6	21.2	21.6	21.6	59.6	44.8	41.6	46.8	51.2	19.6	64	58	20	36.8	20	46	24	19.6	10	48.4	15.2	43.6	35.2	19.6			ptt	CJ60	v	27.4889	34.4299
		ptt	DPT	v	0	9.2	37.2	5.2	58.8	15.6	38	11.2	40.8	17.2	34.8	41.6	42.8	31.2	37.6	54.4	34.4	28.4	22.4	20.4	43.6	28	52	26.4	26.4	24.4	72	58	30.4	21.6	25.6	58.4	36.8	31.6	26.8	25.2			ptt	DPT	v	29.9111	35.0078
		ptt	DPT	d	3.6	6.8	15.6	12.8	23.2	15.2	19.2	8	26.8	13.2	12	13.6	34	29.2	11.6	47.2	58.8	54.4	51.6	39.6	8.8	17.2	18.4	14.4	50.8	37.6	23.6	32	9.2	8.4	14.4	28	14	24	12.4	49.2			ptt	DPT	d	22.5111	25.2056
		ptt	DPT	v	0	6.4	4.8	7.6	14.8	4.8	8	8.8	6	15.6	15.2	10.4	30.4	7.2	4.8	14	25.2	24.4	25.2	8.8	22.8	35.2	12	32.4	33.6	9.6	42.8	37.6	39.2	42.8	43.2	8	30	39.6	47.2	20			ptt	DPT	v	11.5778	29.451
		ptt	DPT	d	0	0.4	1.6	1.6	4.4	2.8	2.8	0.8	2.8	4	0.8	5.6	10.8	4.8	10	15.2	14.8	5.6	6.8	1.6	11.6	18.4	1.2	11.6	13.2	23.6	30	39.2	4.8	18.4	14.8	13.2	10.8	9.2	30	26			ptt	DPT	d	4.93333	15.8035
		ptl	DPC	d	6.8	28	34.4	15.2	17.2	34.4	16	27.6	10.8	21.6	10.4	25.6	37.6	28.4	25.6	26.4	9.2	29.2	56.8	66.8	63.6	77.2	84.4	98.8	68.8	54.8	74.4	86.4	37.6	62.8	72.4	74.8	80	48.8	8.4	32.4			ptl	DPC	d	22.4667	63.8586
		ptl	DPC	v	19.6	51.6	46	68.4	60.4	41.6	8.4	9.6	19.2	14.8	42.8	20	22.4	28.4	36	77.6	54	42.8	72.8	95.6	53.2	67.6	68.4	45.6	42	61.6	84	83.6	26.4	63.2	37.2	61.6	69.2	82	68.8	70.8			ptl	DPC	v	36.8667	64.1031
		ptl	DPC	v	35.6	46.4	25.6	41.2	18.4	29.2	32	27.2	23.6	48.8	42.8	45.6	26	25.6	39.6	47.6	50	46.8	51.2	98	99.2	60	92.8	40	59.6	98.4	99.6	59.6	42.4	97.6	76.4	97.2	57.6	52.4	98	95.6			ptl	DPC	v	36.2222	76.4392
		ptl	DPC	d	20.8	48.4	57.6	64.4	57.6	38.8	25.2	42.4	36	44.4	46.4	57.2	33.2	25.6	16.8	13.2	21.6	24	59.6	38.4	63.6	42.8	73.6	73.2	88.8	86.4	58.8	33.2	63.2	69.2	82.4	98.4	54.8	45.6	58.4	78.4			ptl	DPC	d	37.4222	64.9478
		ptl	DS	d	9.2	13.6	51.6	30.4	15.2	12	24	16	39.6	13.6	9.2	16.8	10	15.6	30.8	18.8	30.4	16.4	40.4	55.2	48.4	50.8	70	70.4	78	64.4	60	88.4	80.4	21.6	38.8	74	57.6	72.4	37.2	49.6			ptl	DS	d	20.7333	58.7686
		ptl	DS	d	12.4	25.6	12	17.2	24.4	14	30	27.2	38	24.4	22.4	20	30.8	24	57.2	42	38.4	12.4	59.6	56	72.8	94	73.6	95.2	74.4	99.6	98.4	34.4	61.6	80.4	78	91.6	86.4	59.2	71.2	94.4			ptl	DS	d	26.2444	76.7282
		ptl	DS	v	9.2	16	33.2	10	14.8	21.6	12	19.2	14.8	34.4	6.8	22.8	14	12.4	8.8	20	12	9.2	77.2	69.2	96.8	90.8	54.8	90.8	77.6	71.2	90	42	66	57.2	97.2	62.8	78.4	56.8	59.2	43.6			ptl	DS	v	16.1778	71.2158
		ptl	DS	v	30.8	18	6.8	9.2	21.6	29.2	11.6	17.6	41.6	55.6	35.6	30.4	30	26	26.8	28	25.6	25.2	53.2	60	79.2	76.4	47.6	25.2	34.8	36.8	17.6	22.8	10	56.4	24.4	22.8	25.6	60.8	42	35.2			ptl	DS	v	26.0889	40.609
		ptl	DPT	d	0	36.4	29.6	15.2	18.4	42	22	56.8	62	49.6	30.8	14.8	35.6	48.4	40.8	36.8	42.4	36	53.2	90.8	73.6	89.2	82	70.4	100	99.6	45.2	81.2	61.2	20.8	54	75.6	76	44.8	54	30.8			ptl	DPT	d	34.3111	66.8148
		ptl	DPT	v	10	19.6	2.8	22.8	12.4	17.6	8.8	21.6	14	18	21.6	15.6	13.6	10.8	24	21.2	19.6	26	50.8	66	70	57.6	57.2	52.8	72	84	46.8	54.8	63.2	52	66.8	55.2	42	48	25.6	39.6			ptl	DPT	v	16.6667	55.8124
		ptl	DPT	v	2.4	21.2	11.6	16.4	5.6	12.4	10.8	18.4	19.6	12.8	11.6	16.8	13.6	22.4	12.4	16	13.2	30	21.2	70	33.6	80.8	66	36.4	40	58	78	32	34.4	24.4	48	71.2	29.2	14.4	48	27.2			ptl	DPT	v	14.8444	45.1656
		ptl	DPC	d	0.4	12.8	26	20.8	11.2	52	26.8	16.8	10	16	21.2	36.4	31.2	22	17.2	16.4	49.6	25.6	75.2	52.8	67.2	83.6	89.6	83.6	74	42	58.8	69.6	62.4	90.4	77.2	68.8	40	34.8	66.8	44.8			ptl	DPC	d	22.9111	65.659
		ptl	DPC	v	1.2	42.8	16	13.2	24	19.2	11.6	24	30	13.6	16	41.6	22.4	24.4	23.2	10.8	19.2	7.6	44.4	74.4	64	39.6	48.8	64.4	31.6	77.2	36.8	36	24	50.8	20.8	22.4	47.6	52.4	42.8	66.4			ptl	DPC	v	20.0444	46.9215
		ptl	DPC	v	16.4	14	4	33.2	23.2	35.6	7.2	54	39.2	25.2	36	70.8	36.4	34	24.4	18.8	48.4	37.2	54.4	62.8	97.6	99.2	94.8	99.2	86.4	49.2	66	85.6	92	70.8	76.4	99.6	68	89.6	84	90.8			ptl	DPC	v	31	81.4848
		ptl	DPC	d	7.2	11.2	10.8	7.2	20.8	8.8	16.4	29.2	14	7.2	14.8	18.8	5.6	4.4	19.2	16	13.6	7.6	11.6	39.2	35.6	33.2	63.6	16.8	35.6	23.6	39.6	14.4	31.6	18	7.2	55.2	26	26.4	23.6	17.6			ptl	DPC	d	12.9333	28.8286
		ptl	DPC	d	66.8	77.2	72	75.6	44	45.6	24.4	34.4	7.2	12.4	40.8	40.8	21.6	16.4	81.6	16	47.2	44.8	26.8	76.4	86.4	48.8	89.2	66.8	95.2	62	94.4	78.4	93.2	76.8	98.8	70.8	80	87.2	92.8	99.2			ptl	DPC	d	42.7111	79.0842
		ptl	DPT	v	30	13.2	24	12	19.2	23.6	45.2	43.6	8.4	8	17.2	21.2	34.4	27.2	32.4	12.4	21.6	15.2	51.2	70.8	55.2	64.8	58.4	60.8	69.2	23.2	16.8	33.2	48	47.2	24.8	58.4	39.6	35.2	7.2	46			ptl	DPT	v	22.7111	45.01
		ptl	DPT	v	12.8	28.4	24.8	33.6	31.6	22	30.4	16.4	11.2	10	12	11.6	14.4	24.8	34.4	26	55.2	16.4	46	60	56.4	78.4	54.8	38.8	27.2	64.8	78.4	47.6	32.8	33.2	62	23.6	36.4	47.6	54	28			ptl	DPT	v	23.1111	48.3441
		ptl	DPC	d	17.2	27.6	10.8	16.4	20	31.2	21.2	12.4	13.2	21.2	40.4	41.6	42.8	68.4	17.6	20	48.8	47.6	57.6	53.6	84.4	64.4	66	72	74	36.4	69.2	28.8	66.4	47.2	30	44.8	16.4	20.8	19.2	31.6			ptl	DPC	d	28.8	49.0553
		ptl	DPT	d	6.8	24.8	24.8	18	14.4	9.6	34.8	27.2	60	27.2	53.2	67.6	76.4	78.4	12.8	12	23.6	44.8	75.6	100	84.8	100	100	100	100	100	85.6	99.2	99.6	75.6	93.6	99.6	100	97.2	80	99.6			ptl	DPT	d	34.2444	93.932
		ptl	DPT	d	0.4	5.2	34	64.8	44.4	48.8	49.6	28.4	28.4	2.8	22.4	16.8	7.2	58.4	36.4	21.6	21.2	23.6	37.2	30.8	98.4	74.4	84.8	99.2	76.4	86.8	85.6	87.2	74.8	95.6	80.4	84.8	84.4	70.4	81.2	72.8			ptl	DPT	d	28.5778	78.084
		ptl	DPT	v	10	45.2	5.6	24	42	14.8	27.6	32.8	37.2	20.8	8	28.8	32.4	20	28.8	15.2	25.2	19.2	42	78.8	90.8	80	85.6	40.4	95.6	72.4	9.2	59.6	50	50.8	57.6	74	56.8	33.6	36.8	32.8			ptl	DPT	v	24.3111	58.1685
		ptl	DPT	v	3.6	56.8	38	28	13.2	27.2	6.4	8	13.6	10.8	14.4	30	19.6	34	34.4	36.4	18.8	40.4	64.4	42.4	48.4	80.4	50	83.6	80	80.8	63.2	83.6	51.2	69.2	70.4	85.6	70.8	40	51.2	86.4			ptl	DPT	v	24.0889	66.7704
		ptl	DPC	d	0.8	5.2	22.4	34.4	17.2	12.8	20.4	27.6	16.8	18.4	22	19.6	17.2	15.2	8	28	11.2	40.4	55.2	71.6	70.4	85.2	65.2	65.2	35.6	59.2	72.8	74.8	39.2	23.2	50.8	17.6	32.8	50.8	49.2	41.6			ptl	DPC	d	18.7556	53.3674
		ptl	DPC	v	15.2	13.6	52.4	14.4	49.6	22.8	47.2	26	24.4	25.2	12.8	43.2	12.4	36.8	38.8	49.6	26	68.4	46	77.2	43.6	76.8	74	75.6	69.2	88.4	53.6	67.6	74.4	44.8	69.6	27.2	29.2	59.2	76	34.4			ptl	DPC	v	32.1556	60.3912
		ptl	DPC	v	12.4	24.8	44.8	44.4	42.4	25.2	23.2	11.2	27.6	22	8.8	27.6	47.6	41.2	16.8	39.2	20.4	54	34.4	54	49.2	62.4	68.4	64.4	73.6	74	24.8	62.4	30	40	29.2	55.6	40.4	56.8	70.8	45.6			ptl	DPC	v	29.6444	52.0116
		ptl	CS	d	3.6	21.2	32.4	66.4	33.6	24.8	14	30	45.6	65.2	49.2	66	23.6	54.4	14.8	30.8	48.4	31.2	59.6	76	77.2	67.6	90.4	80.8	75.2	95.2	76.8	96	64.8	64.8	67.2	66	81.2	75.2	77.6	52			ptl	CS	d	36.4	74.661
		ptl	CS	v	14.8	50.8	58.8	51.2	14	62	46	36.4	46.4	52	52.8	10.4	14	20	10.8	4	22.4	41.6	46.8	92	42	64.8	50.4	66.8	72.8	54.8	26.8	73.2	77.2	78.4	66.4	70.4	65.6	78.8	70.8	35.6			ptl	CS	v	33.8	62.9918
		ptl	CS	v	1.2	48.4	14	43.2	19.6	10.8	14.8	41.2	44.4	62	16.8	18.4	50.4	24	37.2	44	86	43.2	70	50.8	63.2	50	48	79.2	79.6	33.2	56.4	63.6	82.4	42.4	13.2	23.6	48	63.6	64	37.6			ptl	CS	v	34.4222	53.8342
		ptl	CS	d	34.4	17.6	21.6	46	38.4	35.2	65.2	70	31.6	21.2	44.4	36.4	30.8	43.6	34.4	36.4	20.4	37.2	20.8	49.2	68	82.8	78	68	78.8	92	46.8	27.6	51.6	55.2	25.2	26	26.4	69.2	62	37.2			ptl	CS	d	36.9333	53.6119
		ptl	DS	d	2.4	25.6	2.8	22.8	41.2	10.8	50.8	39.6	56.8	41.6	36.4	19.2	7.6	21.6	7.6	10.8	31.2	10	38	76.8	74.4	72	57.2	88.4	64.4	38	58.8	91.6	68	80	71.2	26.8	54.8	52.4	32.8	6.8			ptl	DS	d	24.3778	58.4797
		ptl	DS	v	2.4	50.4	14.4	33.6	17.6	39.2	26.4	23.6	42	62.4	24.4	33.6	55.6	26	18.4	20.4	4.8	14	64.8	56.8	70.8	96	82	78.4	81.2	35.2	87.2	77.6	81.6	62	62.8	20.4	24	45.2	76.8	29.2			ptl	DS	v	28.2889	62.9029
		ptl	CS	v	19.2	41.2	12	35.6	20.4	50.4	57.6	55.6	32.4	40.8	44.8	19.6	5.6	25.2	21.6	21.6	25.6	33.2	40	22.8	56.8	73.2	64.4	33.6	38.8	75.2	67.2	96	23.2	67.2	62.8	39.2	55.6	42	26.8	54.4			ptl	CS	v	31.2444	52.1894
		ptl	CS	d	0.8	4.8	6	12.8	4	29.6	26.8	22.4	22.4	8.4	6.8	7.6	4.4	15.6	16	9.2	33.6	14.8	27.2	38.4	42	42.4	34.4	40.8	58	46.8	16	36	34.4	34	27.2	25.6	9.6	16.8	12	12.4			ptl	CS	d	13.6667	30.7846
		ptl	CJ60	d	18.4	44.4	63.2	77.2	40.4	51.2	15.2	38.4	19.6	34	45.2	42	44.4	44	62.8	50.8	42.8	32.8	64	86.8	90.4	92.4	96.8	97.2	87.2	82.4	84.8	83.2	78.4	82	68	74.4	78.4	82.4	74.8	84.8			ptl	CJ60	d	42.6	82.7073
		ptl	CJ60	d	10	17.2	22.8	77.6	35.2	50	26.4	55.2	58.8	56.8	24.8	71.2	65.6	28	26	25.2	33.6	36	16	47.6	77.6	61.2	77.2	73.2	62.4	53.2	76.4	81.2	88.8	84.4	87.6	95.6	56.4	6	54.4	60.8			ptl	CJ60	d	40.0222	64.4588
		ptl	CJ60	v	13.6	16.4	41.2	30.8	11.2	14.4	19.2	17.6	13.2	14.8	16.8	45.2	59.2	42	27.2	9.2	5.2	5.2	20.8	43.6	34.8	47.6	43.2	54.8	44	38	34.8	49.6	57.6	32.4	30.4	13.6	51.6	58.4	46.4	60.8			ptl	CJ60	v	22.3556	42.365
		ptl	CJ60	v	24.4	18.4	26.4	14	6.8	16.8	11.6	31.2	11.6	27.6	10.4	37.2	46.8	34.8	34.4	32.8	20.8	20.8	48	75.6	55.2	72	79.2	88	48	58	69.6	77.2	78.8	74.4	74	96	76.8	95.6	82.8	63.2			ptl	CJ60	v	23.7111	72.9273
		ptl	CJ60	d	0	60.4	80.4	31.6	40	16.4	24	10	12	30.4	52	48.4	78	65.2	21.2	33.6	20.4	52.8	47.2	31.6	72	74	47.2	76.4	91.2	40.4	66	69.2	68.8	27.6	42.8	78.4	44	51.2	39.6	6.4			ptl	CJ60	d	37.6	54.1231
		ptl	DPT	v	0.4	20	12	59.6	69.2	38.4	42.8	32.8	25.2	44	23.6	6.8	35.2	54.8	23.6	7.6	29.2	22.8	79.6	86.4	99.2	99.2	74.4	98.4	98.4	57.6	86.8	66.8	70.8	82.8	89.6	64.4	79.6	60	58	71.6			ptl	DPT	v	30.4444	79.1065
		ptl	CJ60	v	0	36.8	45.2	38.8	22.8	32	30.4	30.4	43.6	43.6	39.2	44.8	47.2	52.8	49.6	74.4	24	72.8	96.8	73.2	56.8	90	74.4	61.6	61.6	81.2	82	77.6	89.2	83.2	93.6	82.8	99.6	34	5.2	22.8			ptl	CJ60	v	40.4667	70.3267
		ptl	CJ60	d	4	28.8	52	8	18.4	5.2	24	17.6	19.6	16	40.8	10.8	27.6	26	14.4	12.8	11.6	14.4	74	68	97.2	85.6	47.6	88.4	50	53.2	14.4	61.2	49.6	62.8	77.6	60	46.8	33.6	19.2	26			ptl	CJ60	d	19.5556	56.4125
		ptl	DPT	d	8.8	24.4	48.8	36.8	36.4	12.8	29.6	12.4	38	33.6	21.2	5.6	17.2	22.8	10.4	16.8	23.2	42.8	59.2	99.6	99.6	40.4	95.2	97.6	27.2	88	76	47.6	36.8	68	77.2	89.2	49.2	51.6	44.8	64			ptl	DPT	d	24.5333	67.3038
		ptl	DPT	v	1.6	3.6	9.2	26	13.6	6	10.8	16.8	20.8	14	16.8	13.6	3.2	8	13.2	18.8	10.4	11.2	32.4	38.4	47.6	51.2	64.8	47.6	28.4	56.4	35.2	50.4	36	50.4	54.4	22.8	18.8	45.6	39.6	33.6			ptl	DPT	v	12.0889	41.876
		ptl	DPT	d	0.4	26	62.8	60.8	66.8	5.2	45.6	66.8	44.8	24.8	20.8	54.4	28.4	14.4	45.2	19.6	38.8	2.4	64.4	66.8	26	91.2	53.6	65.2	82.4	82	55.6	61.6	72.4	70	43.2	51.6	77.2	74.8	72.8	82.4			ptl	DPT	d	34.8889	66.3036
		ptl	CS	d	11.2	40	54.8	32.8	25.2	33.2	28.4	23.6	42	23.2	39.6	26	33.2	9.2	20.4	14.4	36.8	25.6	18.8	27.2	60.4	6.8	51.2	29.6	65.2	53.6	50	42.8	35.6	18	20.8	27.2	25.6	16.8	14.4	41.6			ptl	CS	d	28.8667	33.6519
		ptl	CS	v	0	38	37.2	34.8	35.6	7.6	20	14	41.2	32.8	56	20.8	26	13.6	41.6	38.4	14	18.8	69.2	54.4	50.4	79.6	86	60.4	73.2	56	78.4	62	76.4	74	66.4	74.8	64.4	72.8	78.8	69.2			ptl	CS	v	27.2444	69.2598
		ptl	CS	v	24	44	43.6	29.6	23.2	47.6	72.4	50	21.6	13.2	17.6	19.2	36	52	32.8	27.2	55.2	15.2	45.6	93.2	92.4	86	65.2	99.2	98.8	77.2	99.2	53.2	94.8	96.8	99.2	86.4	97.2	98.4	96.8	95.2			ptl	CS	v	34.6889	87.5083
		ptl	CS	v	44.8	28	38.8	18.8	60.8	52	65.6	46	61.2	22	51.2	53.2	49.6	29.2	69.6	75.6	56	12.4	52.4	78	89.6	88.4	86.8	72	96.4	86.4	70	97.6	84.4	91.2	69.6	47.2	54	72.4	98.8	87.6			ptl	CS	v	46.3778	79.062
		ptl	CJ60	d	15.6	15.2	26.8	37.6	16	51.6	55.6	39.6	28.4	61.2	75.2	30.4	59.2	41.2	53.6	53.6	45.6	52	68	54.8	74.4	81.6	78	86.4	78	76	78.8	75.6	72.4	59.6	66	57.2	75.2	79.2	82	83.2			ptl	CJ60	d	42.1333	73.7053
		ptl	CJ60	d	3.2	5.2	3.2	11.2	9.6	26.8	20	8.4	13.2	15.6	2.4	16	18.8	18.4	15.2	10.4	18.8	20.4	54	41.2	34	34	72.4	40	36	48.8	16.4	15.6	12.8	38.8	34.4	46	26.8	27.6	51.2	53.6			ptl	CJ60	d	13.1556	37.9862
		ptl	CJ60	d	6.4	23.6	22.8	6.4	27.6	16.4	17.6	17.6	13.6	26	23.6	22.8	48	48.8	45.2	22.4	30.8	26	44.4	41.6	55.2	62.4	31.6	41.6	37.2	51.2	69.2	50	22.8	39.2	42	21.2	48.8	22	46	44.4			ptl	CJ60	d	24.7556	42.8317
		ptl	CJ60	v	6	24	28	26.8	40	35.6	6.8	24.8	27.2	32	23.2	20	18.4	54.4	20.4	26	24.4	36	65.6	89.6	89.6	80	94.8	65.2	66.8	84.8	67.6	84	48.4	33.2	45.6	5.6	24	21.2	72.4	20.8			ptl	CJ60	v	26.3333	58.8575
		ptl	CJ60	v	30.4	30.4	34.4	29.6	34.8	10.8	14	43.6	45.6	25.2	36.4	18	26.8	18.4	54.4	20	32.4	43.6	8.4	54.8	32.8	75.2	62.8	76.4	50.8	41.2	64	23.2	49.2	28.4	38.4	50.8	68	41.2	6.4	19.6			ptl	CJ60	v	30.4889	43.9876
		ptl	CJ60	v	6.8	12	6.8	8	8.4	6	6.8	13.2	0.4	11.2	18.4	24.8	13.2	10.8	6	9.2	17.6	8.4	42.4	64	64.4	28	63.2	62	54.4	49.2	41.2	15.6	34.4	35.2	30.4	27.2	53.2	25.6	32.4	21.2			ptl	CJ60	v	10.4444	41.3425
		ptl	CJ60	v	11.6	5.6	18.4	18.4	32.4	37.6	11.6	12	16.4	6	14	18.4	24.8	46.4	46.8	32.4	36.8	16	51.2	74	88	88.4	76.8	64.4	81.6	82.4	83.2	54	87.6	72.4	89.2	72	78.4	77.2	86.4	40.4			ptl	CJ60	v	22.5333	74.8833
		ptl	DPC	d	14.8	18	45.2	19.6	10.4	30	38.8	17.6	44	60.8	66	20	6	24.8	51.2	46.4	15.6	26	40	63.6	52.4	48.8	74.4	66.4	42	69.6	30.4	34	45.2	37.6	23.6	25.6	19.2	23.6	21.6	21.6			ptl	DPC	d	30.8444	41.098
		ptl	DS	v	19.6	27.2	18.4	15.2	13.6	11.6	4.4	13.2	3.6	18	13.6	13.2	8	32.4	38.4	33.6	57.2	6.4	43.6	37.6	65.2	61.2	19.2	20	15.2	7.6	17.2	28.8	27.2	41.6	28.4	26.8	30.4	31.6	27.6	44.4			ptl	DS	v	19.3111	31.8737
		ptl	DS	v	5.6	17.6	37.2	20.8	11.2	8	5.6	22	22.8	9.6	19.6	4	14	13.2	27.2	24.8	20.8	8	39.2	89.6	69.6	84.8	74	67.6	63.2	63.2	53.2	62.4	63.6	71.6	16.8	44.4	40.4	64.4	47.6	23.2			ptl	DS	v	16.2222	57.7239
		ptl	DS	v	23.6	20.4	18.4	12.8	16	24.8	26	34.4	32	39.6	29.2	34	48.4	22	16	37.2	13.2	35.2	53.6	56.4	64.4	66	64.8	21.2	25.6	52.8	57.2	72.8	13.6	12	45.2	28	29.2	24.4	20.4	16.8			ptl	DS	v	26.8444	40.2534
		ptl	DS	v	8.4	12	24.4	15.6	16	18.4	24	15.2	14.4	15.2	6.8	21.2	12.8	21.6	16.8	18.8	10.8	17.6	54.8	65.6	54.4	36.4	62	83.2	66.8	52	64	47.2	46	64	42	10.4	39.2	34.8	26.4	30.4			ptl	DS	v	16.1111	48.8775
		ptl	DS	d	36.4	30.4	16	4.8	16.8	5.6	12.8	15.6	30.8	31.6	35.6	13.6	29.6	38	18	24.4	16.4	20.8	52.4	62.4	90.8	94	98	62	80.4	86	82.8	61.2	74.8	76.8	62	62.8	87.2	86.4	84	79.6			ptl	DS	d	22.0667	76.8838
		ptl	DS	d	13.2	16.4	5.6	12	10.4	8.4	12.4	8	6.4	18.4	53.6	44.4	11.6	25.6	3.2	5.2	35.6	16	39.6	39.2	59.6	70.8	66.4	37.6	22.4	27.2	16.8	38.8	39.6	19.6	36.4	16.8	15.2	58.8	43.6	28.4			ptl	DS	d	17.0222	37.6084
		ptl	DS	d	2.4	14.8	2	24	7.6	13.2	28.8	19.2	8.8	18.4	72.8	75.6	55.2	66.8	57.6	52.8	48.8	40	48.4	58.4	56.8	80	75.6	14	52.8	30.4	47.6	61.6	68	26	24.4	26.8	18	42.8	50.4	42			ptl	DS	d	33.8222	45.788
		ptl	DPC	d	10.8	6	7.6	13.2	10	9.6	13.2	12.8	20.8	37.2	37.6	28.4	9.2	60	22.8	30.4	20.8	18.4	19.2	51.6	32.8	63.2	18.8	30.8	37.6	23.6	48.8	19.6	20.4	50.4	28.4	58.4	37.6	55.2	58.8	50.8			ptl	DPC	d	20.4889	39.2309
		ptl	DPC	d	3.6	9.6	13.6	18	18	17.6	24	10	14	3.2	28.4	14.8	4.8	23.2	14.4	10	18	6	32.8	42.4	40.8	40.4	36.8	35.6	46	42	21.2	44	40	40.4	13.6	25.2	16.8	32.4	17.2	21.6			ptl	DPC	d	13.9556	32.7406
		ptl	DPC	v	0	4	6.4	10.4	11.2	13.6	8.4	22	24.8	4	56	56.4	32.4	32	12	33.6	26.4	16.8	51.2	65.6	69.6	56.8	45.2	84.8	78	28	37.6	40.4	24.4	42	64.4	44.8	34	38.8	43.2	39.6			ptl	DPC	v	20.5778	49.3665
		ptl	DPC	v	1.2	19.2	12.4	11.2	15.2	14	8	5.6	6.4	40.8	36.4	13.6	25.2	15.6	9.6	21.2	27.6	44.8	56.8	67.2	82.4	74	75.6	64	57.6	12.4	24.8	62.8	47.2	25.6	42.8	15.6	22.4	30.4	19.6	28.4			ptl	DPC	v	18.2222	44.9878
		ptl	DPC	v	1.6	9.6	28	6.8	4	4	10	11.6	5.2	36.8	19.2	14.8	13.2	10	24	25.2	14	7.6	56.4	71.6	60.8	33.2	56	48.4	25.6	33.6	51.2	58.4	36	8.4	21.6	16.4	22.4	33.6	29.2	29.6			ptl	DPC	v	13.6444	38.4752
		ptl	DPC	v	19.2	10.8	4.4	9.6	16.8	45.6	21.2	6.4	3.2	51.2	25.6	9.6	15.2	29.2	14	18.4	27.6	18.4	36.4	56.4	38	40.4	72	52.4	62.4	21.6	59.2	29.6	21.2	37.6	38.8	36	51.2	23.2	12	24			ptl	DPC	v	19.2444	39.5866
		ptl	DPT	d	6	9.2	21.2	12.4	4.8	5.6	16	13.6	17.6	32	17.2	7.6	23.6	13.2	21.2	3.6	14.4	35.6	33.6	80	36	64	65.6	55.2	51.2	59.6	56.8	37.6	63.2	63.6	14.8	40.4	28	31.2	26	32.4			ptl	DPT	d	15.2667	46.6326
		ptl	DPT	d	0	13.2	17.2	12.8	6.4	18.8	15.2	10	26	55.2	44.8	23.6	25.6	8.4	12.4	16.8	31.2	17.6	60.8	81.2	35.2	77.2	62.8	66.8	38.4	32.8	27.6	32.4	46.8	56	63.2	31.6	36	46.4	10.8	44.8			ptl	DPT	d	19.7333	47.2772
		ptl	DPT	d	8	12.4	8	17.2	7.6	5.6	18	14	30.4	40.4	28	13.2	25.6	16.4	10.8	13.6	7.6	6.8	71.6	58	58.8	51.6	71.2	62.4	74.4	59.6	87.2	30	37.2	13.2	16.4	32.8	33.6	32.4	12	47.2			ptl	DPT	d	15.7556	47.2105
		ptl	DPT	d	22	23.2	30.4	16.8	26.4	18.8	17.6	16	45.6	28	12.4	12	8.8	30.8	20	21.2	14	32.8	48	51.2	56	78	63.2	48.4	65.2	74.4	35.2	26.4	53.2	29.2	33.2	45.2	43.2	28	50.8	59.2			ptl	DPT	d	22.0444	49.3443
		ptl	CS	v	27.6	18	55.6	21.2	19.2	17.2	31.2	22	15.6	16.4	43.6	27.2	30.8	30	28.4	19.6	20.4	19.2	64	74	79.2	69.2	54.8	69.2	52.8	22.4	20.8	36.4	37.6	18.4	10.8	26	28.8	58.8	38	48.4			ptl	CS	v	25.7333	44.9878
		ptl	CS	d	9.6	55.6	54	41.2	39.6	30	15.2	15.2	21.6	30	64.8	16.4	48.4	20.4	22.4	52	16.8	29.2	41.6	73.2	82.4	86.4	89.6	84.8	87.2	81.6	26	17.6	78.4	70	66.4	82.8	63.2	72.4	62.8	76			ptl	CS	d	32.3556	69.0376
		ptl	CS	d	0	16	31.2	16.8	27.2	6	24.8	29.2	16.4	11.2	20	20	20	28.4	37.6	16.4	12.4	10	64.4	84.8	72.8	65.6	83.6	82.4	80.8	70.8	66.4	31.6	54.4	68.4	70.4	56.8	44	22.8	53.2	36.4			ptl	CS	d	19.0889	61.6581
		ptl	DPT	v	2.4	16	28.8	8.8	4.8	14	12	15.6	2.8	3.2	18.4	22	24	20.4	10.8	15.6	6.8	7.2	54.4	86.4	41.6	20.4	36.8	59.6	65.2	58	30.8	63.2	37.6	46.8	70.4	64	15.6	31.2	32	26.8			ptl	DPT	v	12.9778	46.7215
		ptl	DPT	v	12.8	16	29.6	22.8	7.6	33.2	16.4	17.6	16	7.2	34.4	19.6	52	26	5.2	50.8	19.2	21.6	60.8	88.8	94.8	80.4	88.4	83.6	62.4	70.4	99.2	99.6	92.4	82	78.8	94.8	75.2	92	76.8	85.6			ptl	DPT	v	22.6667	83.6853
		ptl	DPT	v	12	4.4	12.8	8.8	32.8	17.6	13.2	4.4	17.2	20.4	44.8	22.4	24	27.2	32	16.8	12	24.4	70.4	76.8	81.2	57.6	59.2	91.2	55.6	58	58	25.2	78.4	40	43.6	6	53.2	28.4	40.4	47.6			ptl	DPT	v	19.2889	53.9453
		ptt	CS	d	33.6	39.2	31.2	35.2	18.8	46	58.4	27.6	12	64	46	12.8	42	28.4	18.8	38.4	20	38	4.4	22	26	53.2	66.8	54	60.8	36	30.8	25.6	34.8	51.6	59.2	31.6	35.6	50.8	50	34.4			ptt	CS	d	33.9111	40.4312
		ptt	CS	v	12.8	19.6	38	10.8	21.2	50.8	62.4	36.8	50	28	46.8	45.6	72.8	63.6	8.4	32	28.8	30.4	51.6	28.4	35.6	58.4	61.6	84.4	48.4	61.6	71.2	69.6	57.6	64.8	58.8	62.4	58.8	80.8	50.8	52.4			ptt	CS	v	36.6	58.7464
		ptt	CS	v	2.4	30	54.8	51.2	28.4	54.8	59.6	63.2	42	17.6	19.6	12.4	30.8	25.2	28.4	17.2	44.4	42.4	8	35.6	46.8	10.8	24	27.2	70.8	56.8	66	37.6	54.4	73.6	65.6	76.4	70.4	76.4	51.2	52.4			ptt	CS	v	34.6889	50.2334
		ptt	CS	v	55.6	78	48.8	36.4	41.2	45.6	73.6	56	49.2	14.4	47.6	72.8	61.2	73.2	78.4	39.2	41.2	29.2	9.6	43.2	44	66	70.4	64.8	46.4	64.8	76.8	71.6	73.2	69.6	24	20.4	51.6	70.4	80	62			ptt	CS	v	52.3111	56.0569
		ptt	CJ60	d	0.4	8.4	7.2	1.2	10	3.6	20.4	11.2	8.4	9.2	14	18	24.8	16.8	19.2	19.2	44.4	25.2	43.2	17.6	31.6	54.4	9.6	27.2	40.4	55.2	50	37.6	60.8	70.4	71.6	66	61.2	39.6	35.2	58.8			ptt	CJ60	d	14.5333	46.1436
		ptt	CJ60	d	2.4	9.6	7.6	7.2	1.6	10.4	27.6	10	5.6	6.8	7.2	4.8	8.8	2.8	6.4	5.2	10.8	9.6	4	7.2	26	17.2	46.4	34	25.2	30.8	34.4	14.4	27.6	15.2	18.4	20.4	12	15.2	15.2	6.8			ptt	CJ60	d	8.02222	20.5824
		ptt	CJ60	d	2	26	11.6	2	8	7.6	29.6	25.2	12.8	24	7.2	11.6	2.4	12.4	11.6	34.4	12	5.2	16.8	25.2	7.6	24.4	6.4	24.8	14	12.8	40	27.2	34.8	36.8	29.6	34.4	8.8	15.2	9.6	12			ptt	CJ60	d	13.6444	21.138
		ptt	CJ60	v	2	15.2	51.2	35.2	14.4	17.2	41.2	18	20.8	23.6	18.4	9.2	20.4	8.8	35.2	8.4	16.8	36.8	40.4	12.8	32	9.6	6.4	17.6	10	27.2	37.6	19.2	18.8	22	11.2	16	18	7.6	17.6	14.8			ptt	CJ60	v	21.8222	18.8264
		ptt	CJ60	v	40	22	28.8	5.6	55.6	52	62.8	40	18.4	23.6	14.8	37.2	43.2	60.8	20.4	10.4	47.2	38.4	45.2	38	10.8	32.4	37.2	42.4	40	64.4	39.2	38.4	48	33.6	22	38	24.8	3.2	35.2	12.8			ptt	CJ60	v	34.5111	33.6519
		ptt	CJ60	v	5.6	22.8	8	27.2	18	31.6	34.4	28.4	19.6	8.4	12	11.6	22.8	10	32.4	26.4	22.4	14	25.6	21.2	15.6	17.6	26.4	17.2	33.2	28	33.6	30.8	26.4	31.2	33.2	33.6	14	30.4	22.8	20.4			ptt	CJ60	v	19.7556	25.6279
		ptt	CJ60	v	1.6	22	28	6.8	19.6	23.2	22.4	16.4	8	30.4	19.6	7.2	4.8	10.4	1.2	3.6	14.8	15.2	1.6	8.4	13.2	10.8	6	11.2	21.6	15.6	9.2	4.4	5.6	9.2	21.2	8.8	1.2	18.4	7.6	41.6			ptt	CJ60	v	14.1778	11.9804
		ptt	DPC	d	30.4	51.2	21.6	22.8	42.4	29.6	27.2	39.2	25.6	53.6	58.8	19.2	28.4	34.8	46.4	42.8	23.2	16.8	36.8	33.6	24.8	14.4	21.6	29.2	68.4	47.6	61.6	40.8	25.2	37.6	35.2	56.8	24	20.8	25.6	27.6			ptt	DPC	d	34.1111	35.0967
		ptt	DS	v	0.8	2.8	6.4	4.8	2.8	6.4	4.4	8	10.4	18.4	5.2	39.6	3.6	30	18	14.4	10	44.4	14	27.6	17.6	33.6	16.4	35.6	44.4	11.2	23.6	32.4	22.4	16.8	19.6	22.8	7.2	24	26.4	27.2			ptt	DS	v	12.8	23.4941
		ptt	DS	v	5.6	9.6	12.8	4.8	10.4	4	28	15.6	13.6	5.2	8.8	21.6	26	35.2	30.4	22.4	22.4	6	15.2	29.6	7.2	22.4	16	19.2	26.8	26.4	12.4	40	5.6	8.8	6.8	13.2	19.2	8	21.6	42.4			ptt	DS	v	15.6889	18.9375
		ptt	DS	v	19.2	10	13.2	8	28	21.6	11.6	21.2	40	22.8	20.8	34	39.2	38.8	24.8	30	6.8	10.4	14.8	20.8	7.6	10.4	24	21.2	38.4	24.4	25.6	48	30.8	22	27.6	28.4	42.8	19.6	29.2	56.4			ptt	DS	v	22.2444	27.3394
		ptt	DS	v	8	9.6	8.8	6.4	10.4	13.6	9.2	33.6	12.8	17.6	15.2	30.4	20.8	4.4	23.6	8	18.8	21.6	18.8	29.6	17.2	7.6	15.6	18	15.2	20	12.8	30	12.4	11.6	23.6	4.8	23.6	37.2	41.6	16.8			ptt	DS	v	15.1556	19.8044
		ptt	DS	d	0.4	6.8	4	36	43.2	4	15.6	33.6	6	18.4	26.4	25.2	24.4	12.4	33.2	24	30.8	25.6	26.8	41.2	36.8	29.6	28	42	50.4	36	34	44	48.8	57.2	39.2	25.2	18	35.2	49.6	67.2			ptt	DS	d	20.5556	39.4088
		ptt	DS	d	4	23.6	27.2	22	4.8	12	13.6	16.4	29.2	16	17.2	8.8	31.2	19.2	4.8	34	30	15.6	15.2	22	44.4	43.2	38	32	19.2	24.4	19.6	9.6	19.2	35.6	33.6	6.4	14	22	16.8	32.4			ptt	DS	d	18.3111	24.8722
		ptt	DS	d	16.4	14.8	6	27.6	28	14.4	46	60	18.4	22.4	15.6	21.6	19.6	19.6	11.2	5.6	6	20.8	12	47.6	26.8	62	9.6	24.4	26	25.6	20.4	34.8	46.4	51.2	42.8	31.2	35.2	41.2	54.8	56			ptt	DS	d	20.7778	36.008
		ptt	DPC	d	0	4.8	3.6	16	3.6	17.2	26	23.6	7.2	5.6	8.8	14	29.6	19.6	7.6	19.2	14.8	8.8	10.8	21.2	26.4	6	39.6	30	16.8	15.2	8.8	34.8	42	58.8	31.2	19.2	21.2	35.2	11.6	22.4			ptt	DPC	d	12.7778	25.0722
		ptt	DPC	d	15.6	20.4	23.2	24.8	37.6	27.6	30	16.4	25.2	11.6	34.4	18	12.4	20.4	19.6	17.2	20	19.6	33.2	27.2	47.2	27.6	22.4	14.4	12.4	26	22.4	46	50	38.8	21.2	33.6	29.6	10.4	36.4	34			ptt	DPC	d	21.8889	29.6066
		ptt	DPC	v	5.6	14.4	34.4	4	23.2	26.4	32	42.4	21.6	34	14	40.4	56	30	34	24.4	21.2	15.2	29.2	43.6	59.6	48	63.6	22.8	43.6	13.2	58	43.2	45.2	12.8	37.2	33.2	38.8	51.2	50.4	18			ptt	DPC	v	26.2889	39.5421
		ptt	DPC	v	6	6.4	11.2	6	13.6	10.4	8	8.8	5.6	2	6	9.6	23.2	12	8	14.4	25.6	9.6	4	20.4	2.8	5.6	17.2	32.4	8	18.4	8.4	16.4	18.4	29.2	7.2	8.4	20.8	30.4	12.4	12.8			ptt	DPC	v	10.3556	15.1812
		ptt	DPC	v	7.6	14.4	11.6	15.6	13.2	6.4	12.4	2.8	20	5.6	14	11.6	26	6.8	1.6	16.8	9.2	22.8	7.2	14.4	11.6	16.8	27.2	37.2	14	9.2	14	10	25.6	39.6	9.2	22.8	14.8	11.6	15.2	11.6			ptt	DPC	v	12.1333	17.3372
		ptt	DPC	v	6	9.6	26.4	19.6	25.6	13.6	6.8	24	40.8	22.4	11.6	35.2	19.6	28.8	2.8	16.8	9.2	17.2	25.2	31.6	20	31.6	42	51.2	40	46	44.4	27.2	15.6	6.8	12.8	9.6	38.4	20.4	47.6	35.2			ptt	DPC	v	18.6667	30.3178
		ptt	DPT	d	0	4.4	4.8	10	12.8	9.2	2.8	11.6	9.2	11.6	22	14.4	12	4.4	12.4	10.4	21.6	10	6.4	18	8.4	11.2	24	52.4	20.8	26.4	28	34	14.8	36.4	8.8	19.2	10.4	21.6	36.8	22.8			ptt	DPT	d	10.2	22.2494
		ptt	DPT	d	2.4	14.4	33.6	22	17.6	10.8	12	6.8	11.6	36	15.6	46.8	44.4	50	9.6	21.6	15.2	30.8	14.4	18	68	20.8	56.8	40	34.8	33.2	44.4	10	28	34	18.4	14.8	13.2	14.8	11.6	13.2			ptt	DPT	d	22.2889	27.1394
		ptt	DPT	d	9.6	8.8	14.4	20	28.4	16	64	46	12.4	6.8	21.6	33.6	34.4	35.6	10	22	32	39.6	33.2	64.8	41.6	31.2	16.8	38	37.2	10.8	35.2	32.4	20.4	14	10	12.8	13.6	32	13.6	32.4			ptt	DPT	d	25.2889	27.2283
		ptt	DPT	d	1.6	2.4	11.2	1.6	0.4	3.6	8	35.6	24	7.6	3.2	6.8	12	12.4	8	16.8	8.8	7.2	8	6.8	22	16	39.6	8.4	38	46	24.8	26	11.2	20.8	36	32.8	13.6	13.6	27.2	20.4			ptt	DPT	d	9.51111	22.8495
		ptt	CS	v	4.4	25.6	24.8	38	3.2	27.2	10.8	21.2	17.6	6	21.2	28	40.8	27.6	17.2	24.4	21.2	51.2	20	4.4	11.2	19.6	31.2	18	31.6	47.2	25.2	18.8	12	31.6	48.4	36	28	21.2	40.4	12.8			ptt	CS	v	22.8	25.4279
		ptt	CS	d	12.4	53.6	58.8	9.2	17.2	12.4	15.2	25.2	32.8	40.4	40	45.2	45.6	38.8	12.4	2	26	9.2	27.2	14.4	12.4	21.2	24.4	44.4	30	26.8	36.4	38	32.8	11.2	27.6	19.2	22	14.4	41.2	15.6			ptt	CS	d	27.5778	25.5168
		ptt	CS	d	5.6	3.6	26.8	8.4	20.8	8.4	13.6	11.6	14.4	16.8	18	31.2	23.2	18.4	6.4	18	30	30.8	8.8	23.6	29.6	34	35.6	16.4	29.6	22.4	18.8	8.8	29.2	27.2	12.4	22.4	36	22	18.4	15.6			ptt	CS	d	17	22.8273
		ptt	DPT	v	2	2	2.8	1.6	2	0.8	4.4	2.8	6.8	6.8	2	6.8	11.6	6	2	4	6.4	9.6	6.8	2.8	5.2	4.4	8.8	12	8.8	24.4	11.2	2	10	5.2	12	17.6	18	4.8	10.8	6.4			ptt	DPT	v	4.46667	9.51323
		ptt	DPT	v	5.6	44.4	19.6	14.4	7.6	21.2	9.2	31.6	4	25.2	33.2	28	26	33.2	7.2	16.8	12.8	60	10.4	47.2	50.4	43.2	34.4	25.2	8.8	26	46.8	24.8	23.6	39.2	28.4	22.8	31.2	20.4	21.6	14.8			ptt	DPT	v	22.2222	28.8509
		ptt	DPT	v	3.2	3.2	23.6	10.8	19.6	5.6	28.4	5.2	44.4	60.8	14.8	17.6	18.8	15.6	6.4	5.2	10	8.4	14.4	28.4	22	19.2	53.2	38.4	11.6	27.6	11.2	8.8	9.6	26.4	14	20	10	7.2	6.8	17.6			ptt	DPT	v	16.7556	19.2487
