# Supplementary material for: Dorsal hippocampus mediates light–tone associations in male mice
Source: eLife. 2025 Dec 3;14:RP105863. doi: 10.7554/eLife.105863 (PMC12674615; doi:10.7554/eLife.105863)
Supplement: Source data 2. [file elife-105863-data2.xlsx]

## Sheet: Figure 1 Suppl. 1
	PANEL A	Deeplabcut	EzTrack	Manual		PANEL B	Deeplabcut	EzTrack	Manual		PANEL C	Deeplabcut	EzTrack	Manual		PANEL D	Deeplabcut	EzTrack	Manual
		3.36667	0.429167	0.2625			1.675	5.05833	0.441667			35.1667	36.5	35			37.6667	17	38
		10.0708	6	4.64583			4.875	15.2167	0.45			12.6667	5.5	10			42.3333	38.3333	41
		5.85417	4.37083	1.27083			3.64167	21.8292	0.304167			43.1667	34.6667	40			37.6667	29.8333	35
		7.46667	4	0.833333			4.07083	16.35	0.654167			12	3.16667	11			26.8333	27.8333	27
		5.23	4.56333	1.22			3.49	23.91	0.106667			18.1667	11.5	16			26.6667	44.3333	30
		2.87083	0.570833	0.266667			3.5	11.65	0.120833			4.33333	0	4			7.16667	4.33333	5
		16.5312	6.75	5.09375			22.1667	19.6146	4.40625			15.5	2.5	10			29.5	38.6667	32
		45.0417	49.725	36.325			28.1917	37.0167	12.55			5.83333	0	2			14.3333	11.8333	13
		17.7604	15.4062	6.04167			42.4062	38.9062	26.5938			18.8333	5.66667	10			49	58.3333	52
		9.20833	6.34167	1.58333			45.3917	40.2833	33.3833			4.33333	0	4			10.3333	7.16667	7
		20.8167	21.525	5.54167			15.0917	19.1667	4.15			85.0667	96.6667	90			71.4667	80.8	77
		16.8083	13.9583	3.46667			12.2833	9.2	0.425			13.4667	13.4667	13			29.8667	44.9333	35
		9.85417	3.7326	1.73958			2.52083	2.42708	0			46.8	55.4667	50			25.8667	57.6	33
		22.3021	16.4249	9.73958			2.73333	9.58333	0.133333			29.0667	56.4	51			33.2	53.8667	42
		7.67708	0	1.375			2.55208	5.10417	0.1875			67.0667	86	77			28.2667	48.8	40
		5.46875	0.354167	0			5.075	12.1146	0.425			36.9333	38.4	36			38.2667	39.8667	37
		12.6333	10.4917	2.1			1.08333	7.51042	0			67.7333	76.9333	69			41.2	56.6667	50
		4.82292	1.65625	0.0729167			3.225	13.7604	0.241667			47.3333	52.2667	48			30.5333	54.8	35
		0.420833	0.375	0			4.07083	0.229167	0.654167			68.5333	72.5333	69			47.2	61.0667	55
		0.193333	0.0533333	0			3.64167	3.14583	0.304167			47.8667	53.3333	48			28.1333	46.6667	30
		0.35	0.216667	0			2.22083	5.80417	0.108333			30.1667	24.3333	25			67.3333	67.3333	67
		0.173333	0.0533333	0			0.583333	0.0625	0			17.3333	11.8333	16			58.1667	55.1667	59
		2.49	8.31	0.29			18.7133	2.29667	0.703333			15.8333	3.16667	15			62	65	67
		0.606667	0.54	0			0.879167	0.520833	0.0541667			19.1667	17.8333	19			47.5	34.6667	45
		34.3333	64.8333	35			34.3333	64.8333	35			34.3333	64.8333	35			65.8333	61.3333	60
		13.6667	8.83333	10			13.6667	8.83333	10			13.6667	8.83333	10			43	35.6667	45
		14	5.16667	10			14	5.16667	10			14	5.16667	10			61	68.6667	60
		11.1667	7.83333	10			11.1667	7.83333	10			11.1667	7.83333	10			45.8333	44.5	41
		9.66667	11.1667	8			9.66667	11.1667	8			9.66667	11.1667	8			39.3333	35.1667	40
		6.83333	2.66667	5			6.83333	2.66667	5			6.83333	2.66667	5			21.6667	22.5	49
		31.6	26.8	30			31.6	26.8	30			31.6	26.8	30			51.3333	49.7333	31
		18.5333	15.0667	17			18.5333	15.0667	17			18.5333	15.0667	17			30.4	33.6	32
		29.0667	35.4667	28			29.0667	35.4667	28			29.0667	35.4667	28			36.2667	26.4	33
		6.26667	2.4	5			6.26667	2.4	5			6.26667	2.4	5			29.3333	17.6	25
		5.86667	5.33333	5			5.86667	5.33333	5			5.86667	5.33333	5			52.4	45.6	50
		0.4	0	0			0.4	0	0			0.4	0	0			55.7333	66.8	61
		7.6	0	3			7.6	0	3			7.6	0	3			69.3333	65.6	66
		4.8	0	2			4.8	0	2			4.8	0	2			72.6667	72.4	70
		7.6	0	5			7.6	0	5			7.6	0	5			53.6	49.3333	51
		0.4	0	0			0.4	0	0			0.4	0	0			28	28.2667	29
		21.7333	35.2	25			21.7333	35.2	25			21.7333	35.2	25			44.8	46.4	43
		33.3333	34	36			33.3333	34	36			33.3333	34	36			6	6.8	7
		45.2	61.4667	50			45.2	61.4667	50			45.2	61.4667	50			23.4667	21.4667	23
		25.4667	19.2	24			25.4667	19.2	24			25.4667	19.2	24			5.46667	2.26667	7
		27.8667	33.6	25			27.8667	33.6	25			27.8667	33.6	25			22	31.6	26
		8.4	8.53333	8			8.4	8.53333	8			8.4	8.53333	8			1.06667	2	3
		24.1333	25.7333	24			24.1333	25.7333	24			24.1333	25.7333	24			25.0667	56.2667	28
		2.93333	3.2	2			2.93333	3.2	2			2.93333	3.2	2			5.06667	5.6	4
		18	9.33333	14			18	9.33333	14			18	9.33333	14			13.3333	26.2667	20
		27.4667	21.8667	24			27.4667	21.8667	24			27.4667	21.8667	24			5.73333	4.13333	5
		23.6	12.8	21			23.6	12.8	21			23.6	12.8	21			33.0667	40.1333	38
		33.3333	30.9333	30			33.3333	30.9333	30			33.3333	30.9333	30			8.26667	2.93333	6
		25.2	27.4667	25			25.2	27.4667	25			25.2	27.4667	25			4.93333	0	5
		30.9333	45.6	30			30.9333	45.6	30			30.9333	45.6	30			7.33333	3.2	4
		25.7333	23.4667	25			25.7333	23.4667	25			25.7333	23.4667	25			14.5333	6.53333	8
		19.3333	18.5333	20			19.3333	18.5333	20			19.3333	18.5333	20			3.46667	3.06667	4
		11.3333	14.8	11			11.3333	14.8	11			11.3333	14.8	11			9.2	4.8	7
		3.2	2	2			3.2	2	2			3.2	2	2			9.46667	10.8	8
		12.6667	7.33333	12			12.6667	7.33333	12			12.6667	7.33333	12			19.7333	6.26667	15
		4.26667	0	5			4.26667	0	5			4.26667	0	5			17.4667	10.4	16
		14.6667	18.5	16			14.6667	18.5	16			14.6667	18.5	16			8.33333	5.16667	6
		7.5	3	8			7.5	3	8			7.5	3	8			0.666667	0	0
		11.8333	12.5	12			11.8333	12.5	12			11.8333	12.5	12			3.16667	2.5	0
		7.33333	3.16667	7			7.33333	3.16667	7			7.33333	3.16667	7			0	0	0
		14.5	5.16667	15			14.5	5.16667	15			14.5	5.16667	15			9	19.5	5
		11.5	6.33333	12			11.5	6.33333	12			11.5	6.33333	12			0.333333	0	0
		12.6667	9.33333	12			12.6667	9.33333	12			12.6667	9.33333	12			3	0	0
		6.5	3	7			6.5	3	7			6.5	3	7			1.16667	0	0
		8.83333	0	9			8.83333	0	9			8.83333	0	9			9.83333	3.16667	2
		0.666667	0	0			0.666667	0	0			0.666667	0	0			0.833333	0	0
		65.8333	65.1667	65			65.8333	65.1667	65			65.8333	65.1667	65			9.2	45.4667	20
		12	6.33333	12			12	6.33333	12			12	6.33333	12			1.2	11.3333	5
		28.5	45.1667	29			28.5	45.1667	29			28.5	45.1667	29			4.93333	10.9333	6
		30	27.3333	32			30	27.3333	32			30	27.3333	32			7.6	0	4
		61.1667	61.8333	65			61.1667	61.8333	65			61.1667	61.8333	65			4.13333	10.2667	6
		8	5.33333	6			8	5.33333	6			8	5.33333	6			1.2	0	0
		37.6667	32.1667	35			37.6667	32.1667	35			37.6667	32.1667	35			1.73333	0	0
		21	9.5	18			21	9.5	18			21	9.5	18			0.8	4.53333	2
		24.5	15.1667	22			24.5	15.1667	22			24.5	15.1667	22			1.86667	5.06667	1
		4.16667	0	2			4.16667	0	2			4.16667	0	2			1.2	4.26667	0
		23.1667	0	23			23.1667	0	23			23.1667	0	23			0.666667	3.16667	0
		3.5	0	3			3.5	0	3			3.5	0	3			3.5	6.16667	0
		10.5	0	5			10.5	0	5			10.5	0	5			11.8333	30	21
		6.5	0	5			6.5	0	5			6.5	0	5			3.33333	0	0
		11.8333	0	12			11.8333	0	12			11.8333	0	12			2.66667	7	4
		0.833333	0	0			0.833333	0	0			0.833333	0	0			1.66667	0	0
		3.83333	0	0			3.83333	0	0			3.83333	0	0			1	0	0
		1.83333	0	0			1.83333	0	0			1.83333	0	0			0.5	0	0
		7.16667	0	5			7.16667	0	5			7.16667	0	5			2.66667	12	5
		2.33333	0	2			2.33333	0	2			2.33333	0	2			1	0	0
		10.1667	0	10			10.1667	0	10			10.1667	0	10			29.6	47.0667	32
		13.3333	0	10			13.3333	0	10			13.3333	0	10			5.06667	51.8667	15
		19.8333	2.5	16			19.8333	2.5	16			19.8333	2.5	16			16.2667	21.2	20
		5	0	5			5	0	5			5	0	5			6.66667	8.66667	5
		11.1667	3.16667	7			11.1667	3.16667	7			11.1667	3.16667	7			6	0	5
		0	0	0			0	0	0			0	0	0			1.33333	0	0
		7.83333	0	6			7.83333	0	6			7.83333	0	6			2.66667	4.4	0
		4.33333	0	5			4.33333	0	5			4.33333	0	5			0.933333	0	0
		6.83333	0	6			6.83333	0	6			6.83333	0	6			0.666667	0	0
		0	0	0			0	0	0			0	0	0			0.933333	7.33333	0
		21.4667	23.0667	22			21.4667	23.0667	22			21.4667	23.0667	22			3.06667	15.8667	7
		8.53333	7.46667	7			8.53333	7.46667	7			8.53333	7.46667	7			2.4	11.3333	4
		19.7333	11.8667	20			19.7333	11.8667	20			19.7333	11.8667	20			1.33333	2.4	3
		14.9333	17.6	15			14.9333	17.6	15			14.9333	17.6	15			0.133333	0	0
		14.8	7.46667	14			14.8	7.46667	14			14.8	7.46667	14			0	4.53333	0
		6.53333	6.4	5			6.53333	6.4	5			6.53333	6.4	5			0.666667	2	0
		33.4667	24	32			33.4667	24	32			33.4667	24	32			1.06667	0	0
		16.9333	17.0667	15			16.9333	17.0667	15			16.9333	17.0667	15			1.06667	2.66667	0
		29.7333	33.6	27			29.7333	33.6	27			29.7333	33.6	27			0.933333	0	0
		2.8	2.4	2			2.8	2.4	2			2.8	2.4	2			1.6	14.2667	0
		11.8333	5.66667	8			11.8333	5.66667	8			11.8333	5.66667	8			4.93333	9.33333	3
		6.16667	3.16667	6			6.16667	3.16667	6			6.16667	3.16667	6			2.4	0	2
		9.16667	3.16667	9			9.16667	3.16667	9			9.16667	3.16667	9			14.4	34	25
		2.16667	0	2			2.16667	0	2			2.16667	0	2			0.8	2	0
		7.83333	2.5	7			7.83333	2.5	7			7.83333	2.5	7			2.53333	5.06667	4
		0.833333	0	0			0.833333	0	0			0.833333	0	0			0.4	2.53333	0
		13.8333	0	12			13.8333	0	12			13.8333	0	12			14.5333	51.8667	26
		2	0	2			2	0	2			2	0	2			3.33333	2	3
		7.33333	5.66667	6			7.33333	5.66667	6			7.33333	5.66667	6			2.8	26.4	3
		3	0	3			3	0	3			3	0	3			1.86667	28.1333	0

## Sheet: Figure 1 Suppl. 2
	PANEL D	protocol	group	OFF period	ON period
	% freezing	Mediated Learning	paired	25.0444	46.9438
		Mediated Learning	paired	15.2889	33.0073
		Mediated Learning	paired	18.2667	30.0511
		Mediated Learning	paired	23.9111	25.1389
		Mediated Learning	paired	15.6	40.409
		Mediated Learning	paired	12.8444	43.7431
		Mediated Learning	paired	17.8889	54.0787
		Mediated Learning	paired	9	28.6286
		Mediated Learning	paired	14.4667	24.8055
		Mediated Learning	paired	3.77778	13.1807
		Mediated Learning	unpaired	11.9111	19.7822
		Mediated Learning	unpaired	17.9556	34.8077
		Mediated Learning	unpaired	20.8222	30.3623
		Mediated Learning	unpaired	13.9556	18.493
		Mediated Learning	unpaired	12.3778	15.8924
		Mediated Learning	unpaired	11.3778	18.0929
		Mediated Learning	unpaired	10.0444	15.9591
		Mediated Learning	unpaired	10.0667	18.0929
		Mediated Learning	nolight	5.37778	6.4681
		Mediated Learning	nolight	8.82222	26.8504
		Mediated Learning	nolight	20.0444	24.0053
		Mediated Learning	nolight	10.3556	17.3594
		Mediated Learning	nolight	12.4	22.1605
		Mediated Learning	unpaired	14.0889	34.9633
		Mediated Learning	unpaired	11.1333	22.2494
		Mediated Learning	nolight	11.4	22.4939
		Mediated Learning	nolight	18.7778	23.872
		Mediated Learning	nolight	20.8222	24.1609
		Mediated Learning	nolight	23.3111	26.4948
		Mediated Learning	nolight	15.7333	26.1836
		Direct Learning	paired	31.7111	51.8337
		Direct Learning	paired	14.1556	36.2747
		Direct Learning	paired	11.4222	37.3639
		Direct Learning	paired	22.9556	51.5226
		Direct Learning	paired	16.8444	64.9478
		Direct Learning	paired	18.6	33.7853
		Direct Learning	paired	9.91111	43.9653
		Direct Learning	paired	22.3111	70.4156
		Direct Learning	paired	15.2444	68.5263
		Direct Learning	paired	12.1333	23.872
		Direct Learning	unpaired	14.6889	39.7866
		Direct Learning	unpaired	15.6222	65.7924
		Direct Learning	unpaired	10.8222	31.2292
		Direct Learning	unpaired	19.8	28.962
		Direct Learning	unpaired	19.1778	20.4268
		Direct Learning	unpaired	14.6	39.631
		Direct Learning	unpaired	13.4444	33.0296
		Direct Learning	unpaired	13.5778	39.0087
		Direct Learning	unpaired	11.4222	34.2521
		Direct Learning	unpaired	14.9556	28.3841
		Direct Learning	nolight	13.8889	32.2516
		Direct Learning	nolight	14.2667	39.4088
		Direct Learning	nolight	17.7111	40.4979
		Direct Learning	nolight	8.35556	18.1596
		Direct Learning	nolight	17.9111	44.8544
		Direct Learning	nolight	20.7111	30.629
		Direct Learning	nolight	29.3556	15.8702
		Direct Learning	nolight	15.8222	15.7146
		Direct Learning	nolight	18.7778	30.14
		Direct Learning	nolight	20.3333	19.4043

## Sheet: Hoja2
	PANEL A	Mediated_males	Direct_males		PANEL B	Mediated_females	Direct_females
		34.77053006	43.72708079			27.6252917	33.0592288
		35.28169797	50.41671297			28.38093121	33.88154239
		38.88209801	48.68318702			27.78086454	23.94710523
		26.58073119	47.10523391			13.43482609	35.59284365
		30.31447939	39.42660296			25.96955217	30.88120902
		33.22591399	54.07267474			26.38070897	23.24702745
		34.20380042	32.11467941			19.53550394	30.35555556
		42.99366596	60.49561062			28.31425714	24.94721636
		20.04667185	35.51505723			30.79231026	34.62606956
		16.24624958	39.48216468			19.97999778	35.64840538
		26.13623736	25.1027892			30.81453495	28.80320036
		13.30147794	27.42526947			25.09167685	47.30525614
						30.78119791	42.08245361
						38.85987332	57.83975997
						31.4812757	33.28147572
						22.75808423	32.91476831
						22.78030892	26.28069786
						33.58150906	21.80242249
						16.35737304	35.1927992
						24.36937437	52.9947772
						31.47016335	50.5945105
						24.3249249	40.5045005
						24.52494722	31.10345594
						29.63662629	41.71574619

## Sheet: Figure 2 Suppl. 1
PANEL A	Photometry				PANEL B	Photometry			PANEL C	Photometry
sensor	site	diffs	subtask		sensor	site	diffs		sensor	site	diffs	subtask
GCaMP	dHPC	2.95993	pc1		GCaMP	dHPC	5.98069		GCaMP	dHPC	9.50736	training1
GCaMP	dHPC	0.925152	pc1		GCaMP	dHPC	3.34714		GCaMP	dHPC	8.48348	training1
GCaMP	dHPC	2.01003	pc1		GCaMP	dHPC	1.86323		GCaMP	dHPC	8.64081	training1
GCaMP	dHPC	1.26233	pc1		GCaMP	dHPC	3.11314		GCaMP	dHPC	5.69269	training1
GCaMP	dHPC	2.46069	pc1		GCaMP	dHPC	3.86211		GCaMP	dHPC	12.1122	training1
GCaMP	dHPC	2.66024	pc1		GCaMP	dHPC	4.78216		GCaMP	dHPC	5.77636	training1
GCaMP	dHPC	2.26899	pc1		GCaMP	dHPC	4.0382		RCaMP	dHPC	10.1983	training1
RCaMP	dHPC	6.1727	pc1		RCaMP	dHPC	9.73058		RCaMP	dHPC	7.51994	training1
RCaMP	dHPC	1.71804	pc1		RCaMP	dHPC	3.20421		RCaMP	dHPC	6.64578	training1
RCaMP	dHPC	2.26716	pc1		RCaMP	dHPC	3.29298		RCaMP	dHPC	10.1832	training1
RCaMP	dHPC	0.27424	pc1		RCaMP	dHPC	3.15991		RCaMP	dHPC	4.57442	training1
RCaMP	dHPC	2.62192	pc1		RCaMP	dHPC	6.84761		GCaMP	vHPC	4.63925	training1
RCaMP	dHPC	2.36844	pc1		RCaMP	dHPC	4.28847		GCaMP	vHPC	7.86284	training1
GCaMP	vHPC	3.2919	pc1		GCaMP	vHPC	4.26528		GCaMP	vHPC	2.72671	training1
GCaMP	vHPC	1.7461	pc1		GCaMP	vHPC	2.50111		GCaMP	vHPC	7.5324	training1
GCaMP	vHPC	1.15892	pc1		GCaMP	vHPC	2.46113		GCaMP	vHPC	5.23262	training1
GCaMP	vHPC	4.89211	pc1		GCaMP	vHPC	4.8187		GCaMP	vHPC	3.98818	training1
GCaMP	vHPC	2.25851	pc1		GCaMP	vHPC	5.90412		GCaMP	vHPC	8.49408	training1
GCaMP	vHPC	1.22489	pc1		GCaMP	vHPC	3.50364		RCaMP	vHPC	2.61199	training1
GCaMP	vHPC	1.56647	pc1		GCaMP	vHPC	4.99823		RCaMP	vHPC	7.42988	training1
GCaMP	vHPC	2.3773	pc1		GCaMP	vHPC	2.56808		RCaMP	vHPC	3.66293	training1
RCaMP	vHPC	1.02165	pc1		RCaMP	vHPC	2.39064		RCaMP	vHPC	6.24888	training1
RCaMP	vHPC	1.65374	pc1		RCaMP	vHPC	2.84832		RCaMP	vHPC	5.89555	training1
RCaMP	vHPC	1.77696	pc1		RCaMP	vHPC	2.31106		RCaMP	vHPC	3.62579	training1
RCaMP	vHPC	1.22121	pc1		RCaMP	vHPC	4.49522		RCaMP	vHPC	37.9261	training1
RCaMP	vHPC	0.640155	pc1		RCaMP	vHPC	4.8436		GCaMP	dHPC	10.5357	training2
RCaMP	vHPC	2.51287	pc1		RCaMP	vHPC	3.90244		GCaMP	dHPC	3.61842	training2
RCaMP	vHPC	2.64739	pc1		RCaMP	vHPC	3.90895		GCaMP	dHPC	8.76374	training2
RCaMP	vHPC	2.28099	pc1		RCaMP	vHPC	3.04316		GCaMP	dHPC	7.22574	training2
GCaMP	dHPC	1.97978	pc2		GCaMP	dHPC	5.86168		GCaMP	dHPC	8.40856	training2
GCaMP	dHPC	1.57182	pc2		GCaMP	dHPC	6.31067		GCaMP	dHPC	16.9605	training2
GCaMP	dHPC	1.83908	pc2		GCaMP	dHPC	4.16621		GCaMP	dHPC	14.325	training2
GCaMP	dHPC	2.43681	pc2		GCaMP	dHPC	2.27154		RCaMP	dHPC	13.1876	training2
GCaMP	dHPC	2.58134	pc2		GCaMP	dHPC	2.82178		RCaMP	dHPC	5.63991	training2
GCaMP	dHPC	2.55237	pc2		GCaMP	dHPC	5.85819		RCaMP	dHPC	8.16303	training2
RCaMP	dHPC	0.948562	pc2		GCaMP	dHPC	3.8868		RCaMP	dHPC	9.55281	training2
RCaMP	dHPC	1.23628	pc2		RCaMP	dHPC	6.04739		RCaMP	dHPC	22.8963	training2
RCaMP	dHPC	1.5225	pc2		RCaMP	dHPC	5.7188		RCaMP	dHPC	19.4865	training2
RCaMP	dHPC	2.81981	pc2		RCaMP	dHPC	4.74446		GCaMP	vHPC	2.76465	training2
RCaMP	dHPC	1.33614	pc2		RCaMP	dHPC	2.39667		GCaMP	vHPC	7.40798	training2
GCaMP	vHPC	2.01034	pc2		RCaMP	dHPC	6.15425		GCaMP	vHPC	5.02963	training2
GCaMP	vHPC	0.78004	pc2		RCaMP	dHPC	5.10565		GCaMP	vHPC	4.01258	training2
GCaMP	vHPC	1.46198	pc2		GCaMP	vHPC	3.11548		GCaMP	vHPC	4.78903	training2
GCaMP	vHPC	2.60483	pc2		GCaMP	vHPC	2.91822		GCaMP	vHPC	5.59407	training2
GCaMP	vHPC	1.80297	pc2		GCaMP	vHPC	3.9689		GCaMP	vHPC	4.66511	training2
GCaMP	vHPC	1.76597	pc2		GCaMP	vHPC	4.12287		GCaMP	vHPC	8.38198	training2
GCaMP	vHPC	1.95562	pc2		GCaMP	vHPC	2.74038		RCaMP	vHPC	3.17104	training2
RCaMP	vHPC	-0.25356	pc2		GCaMP	vHPC	3.11373		RCaMP	vHPC	7.26912	training2
RCaMP	vHPC	1.61073	pc2		GCaMP	vHPC	5.30151		RCaMP	vHPC	6.14141	training2
RCaMP	vHPC	3.11267	pc2		GCaMP	vHPC	3.03362		RCaMP	vHPC	3.11613	training2
RCaMP	vHPC	1.30714	pc2		RCaMP	vHPC	1.41162		RCaMP	vHPC	5.85686	training2
RCaMP	vHPC	1.58019	pc2		RCaMP	vHPC	2.70914		RCaMP	vHPC	9.21899	training2
RCaMP	vHPC	1.25095	pc2		RCaMP	vHPC	3.71252		RCaMP	vHPC	5.34573	training2
RCaMP	vHPC	1.82301	pc2		RCaMP	vHPC	4.42698		RCaMP	vHPC	6.47887	training2
GCaMP	dHPC	2.60903	pc3		RCaMP	vHPC	2.50808
GCaMP	dHPC	2.13996	pc3		RCaMP	vHPC	3.4619
GCaMP	dHPC	1.85118	pc3		RCaMP	vHPC	6.229
GCaMP	dHPC	1.56181	pc3		RCaMP	vHPC	3.70142
GCaMP	dHPC	3.68419	pc3		GCaMP	dHPC	4.04251
GCaMP	dHPC	1.26141	pc3		GCaMP	dHPC	3.23203
RCaMP	dHPC	3.14498	pc3		GCaMP	dHPC	4.12278
RCaMP	dHPC	2.10249	pc3		GCaMP	dHPC	3.69233
RCaMP	dHPC	1.20889	pc3		GCaMP	dHPC	2.33966
RCaMP	dHPC	3.85009	pc3		GCaMP	dHPC	4.87526
RCaMP	dHPC	1.53827	pc3		GCaMP	dHPC	4.89773
GCaMP	vHPC	5.93945	pc3		RCaMP	dHPC	4.19132
GCaMP	vHPC	3.28872	pc3		RCaMP	dHPC	2.9319
GCaMP	vHPC	1.53392	pc3		RCaMP	dHPC	2.72106
GCaMP	vHPC	1.57765	pc3		RCaMP	dHPC	2.55132
GCaMP	vHPC	2.24122	pc3		RCaMP	dHPC	6.68616
GCaMP	vHPC	2.72539	pc3		RCaMP	dHPC	2.83879
GCaMP	vHPC	1.45982	pc3		GCaMP	vHPC	5.71633
RCaMP	vHPC	0.831692	pc3		GCaMP	vHPC	3.19805
RCaMP	vHPC	2.85514	pc3		GCaMP	vHPC	3.82872
RCaMP	vHPC	1.94434	pc3		GCaMP	vHPC	6.2902
RCaMP	vHPC	1.2992	pc3		GCaMP	vHPC	4.34682
RCaMP	vHPC	2.42199	pc3		GCaMP	vHPC	2.60316
RCaMP	vHPC	2.02808	pc3		GCaMP	vHPC	4.08015
RCaMP	vHPC	2.24911	pc3		GCaMP	vHPC	3.11848
GCaMP	dHPC	3.49123	pc4		RCaMP	vHPC	4.26823
GCaMP	dHPC	3.26325	pc4		RCaMP	vHPC	0.839038
GCaMP	dHPC	4.54182	pc4		RCaMP	vHPC	2.45402
GCaMP	dHPC	1.77366	pc4		RCaMP	vHPC	6.48457
GCaMP	dHPC	2.13551	pc4		RCaMP	vHPC	1.9805
GCaMP	dHPC	1.30609	pc4		RCaMP	vHPC	3.1658
GCaMP	dHPC	4.95774	pc4		RCaMP	vHPC	4.17016
RCaMP	dHPC	2.97438	pc4		RCaMP	vHPC	3.47893
RCaMP	dHPC	3.48516	pc4		GCaMP	dHPC	4.18495
RCaMP	dHPC	2.15854	pc4		GCaMP	dHPC	2.21041
RCaMP	dHPC	0.00132516	pc4		GCaMP	dHPC	3.02251
RCaMP	dHPC	1.06271	pc4		GCaMP	dHPC	2.41175
RCaMP	dHPC	4.05011	pc4		GCaMP	dHPC	1.57934
GCaMP	vHPC	1.70532	pc4		GCaMP	dHPC	2.08137
GCaMP	vHPC	0.884484	pc4		GCaMP	dHPC	4.90141
GCaMP	vHPC	2.4014	pc4		RCaMP	dHPC	3.39255
GCaMP	vHPC	3.37862	pc4		RCaMP	dHPC	2.50385
GCaMP	vHPC	0.737341	pc4		RCaMP	dHPC	1.80466
GCaMP	vHPC	1.79538	pc4		RCaMP	dHPC	2.04375
GCaMP	vHPC	2.5542	pc4		RCaMP	dHPC	1.89772
GCaMP	vHPC	1.80092	pc4		RCaMP	dHPC	4.87991
RCaMP	vHPC	1.57111	pc4		GCaMP	vHPC	4.78134
RCaMP	vHPC	-0.171144	pc4		GCaMP	vHPC	3.38618
RCaMP	vHPC	1.13098	pc4		GCaMP	vHPC	4.66405
RCaMP	vHPC	1.98578	pc4		GCaMP	vHPC	4.08985
RCaMP	vHPC	0.449993	pc4		GCaMP	vHPC	2.56069
RCaMP	vHPC	2.32093	pc4		GCaMP	vHPC	2.49527
RCaMP	vHPC	1.81536	pc4		GCaMP	vHPC	5.67938
RCaMP	vHPC	1.87395	pc4		GCaMP	vHPC	2.68622
GCaMP	dHPC	4.15922	pc5		RCaMP	vHPC	2.07731
GCaMP	dHPC	6.83545	pc5		RCaMP	vHPC	0.951753
GCaMP	dHPC	1.56451	pc5		RCaMP	vHPC	4.21101
GCaMP	dHPC	2.41449	pc5		RCaMP	vHPC	5.00963
GCaMP	dHPC	0.749817	pc5		RCaMP	vHPC	1.62872
GCaMP	dHPC	2.69563	pc5		RCaMP	vHPC	2.22163
GCaMP	dHPC	2.90609	pc5		RCaMP	vHPC	3.90448
RCaMP	dHPC	3.18765	pc5		RCaMP	vHPC	2.67362
RCaMP	dHPC	4.28785	pc5		GCaMP	dHPC	4.44507
RCaMP	dHPC	0.384307	pc5		GCaMP	dHPC	11.2691
RCaMP	dHPC	1.04899	pc5		GCaMP	dHPC	3.95535
RCaMP	dHPC	3.68645	pc5		GCaMP	dHPC	4.61472
RCaMP	dHPC	2.41411	pc5		GCaMP	dHPC	3.55079
GCaMP	vHPC	1.94985	pc5		GCaMP	dHPC	3.47144
GCaMP	vHPC	1.80972	pc5		GCaMP	dHPC	4.00031
GCaMP	vHPC	1.15771	pc5		RCaMP	dHPC	2.69512
GCaMP	vHPC	2.23918	pc5		RCaMP	dHPC	8.07529
GCaMP	vHPC	1.87425	pc5		RCaMP	dHPC	3.62809
GCaMP	vHPC	2.16414	pc5		RCaMP	dHPC	2.50591
GCaMP	vHPC	1.92399	pc5		RCaMP	dHPC	3.70239
GCaMP	vHPC	2.23531	pc5		RCaMP	dHPC	3.45511
RCaMP	vHPC	-0.257847	pc5		GCaMP	vHPC	4.82103
RCaMP	vHPC	0.779777	pc5		GCaMP	vHPC	3.05903
RCaMP	vHPC	0.66124	pc5		GCaMP	vHPC	3.01472
RCaMP	vHPC	3.69692	pc5		GCaMP	vHPC	5.37833
RCaMP	vHPC	2.19261	pc5		GCaMP	vHPC	4.07425
RCaMP	vHPC	2.39177	pc5		GCaMP	vHPC	3.05639
RCaMP	vHPC	1.81949	pc5		GCaMP	vHPC	2.12075
RCaMP	vHPC	2.38168	pc5		GCaMP	vHPC	3.53635
GCaMP	dHPC	2.04945	pc6		RCaMP	vHPC	2.18031
GCaMP	dHPC	1.18882	pc6		RCaMP	vHPC	2.67398
GCaMP	dHPC	1.47955	pc6		RCaMP	vHPC	2.94701
GCaMP	dHPC	2.72376	pc6		RCaMP	vHPC	3.81644
GCaMP	dHPC	-0.210877	pc6		RCaMP	vHPC	2.53352
GCaMP	dHPC	2.86246	pc6		RCaMP	vHPC	3.36993
GCaMP	dHPC	3.0507	pc6		RCaMP	vHPC	3.42369
RCaMP	dHPC	1.22798	pc6		RCaMP	vHPC	2.92675
RCaMP	dHPC	2.20541	pc6
RCaMP	dHPC	1.44906	pc6
RCaMP	dHPC	2.71834	pc6
RCaMP	dHPC	4.12561	pc6
RCaMP	dHPC	1.4798	pc6
GCaMP	vHPC	1.91867	pc6
GCaMP	vHPC	1.39408	pc6
GCaMP	vHPC	1.51231	pc6
GCaMP	vHPC	3.47861	pc6
GCaMP	vHPC	2.11175	pc6
GCaMP	vHPC	1.63358	pc6
GCaMP	vHPC	2.16899	pc6
GCaMP	vHPC	1.94305	pc6
RCaMP	vHPC	2.72586	pc6
RCaMP	vHPC	0.163968	pc6
RCaMP	vHPC	1.28971	pc6
RCaMP	vHPC	1.61353	pc6
RCaMP	vHPC	1.45713	pc6
RCaMP	vHPC	1.55381	pc6
RCaMP	vHPC	4.72831	pc6
RCaMP	vHPC	1.03138	pc6

## Sheet: Figure 2 Suppl. 2
PANEL D	Photometry
sensor	site	diffs
GCaMP	dHPC	3.36781
GCaMP	dHPC	1.9163
GCaMP	dHPC	5.17559
GCaMP	dHPC	4.89736
GCaMP	dHPC	1.59389
GCaMP	dHPC	3.53244
GCaMP	dHPC	2.70791
RCaMP	dHPC	2.8806
RCaMP	dHPC	0.250705
RCaMP	dHPC	3.53164
RCaMP	dHPC	3.48065
RCaMP	dHPC	5.84707
RCaMP	dHPC	1.39466
GCaMP	vHPC	2.18232
GCaMP	vHPC	0.769315
GCaMP	vHPC	2.39669
GCaMP	vHPC	3.36917
GCaMP	vHPC	1.62799
GCaMP	vHPC	2.49278
GCaMP	vHPC	1.83034
GCaMP	vHPC	1.79393
RCaMP	vHPC	0.726969
RCaMP	vHPC	-0.785141
RCaMP	vHPC	3.66292
RCaMP	vHPC	1.56048
RCaMP	vHPC	0.536271
RCaMP	vHPC	3.11719
RCaMP	vHPC	2.37845
RCaMP	vHPC	1.35866

## Sheet: Figure 2 Suppl. 3
PANEL D	Photometry
sensor	site	diffs
GCaMP	dHPC	10.0215
GCaMP	dHPC	3.61842
GCaMP	dHPC	8.62361
GCaMP	dHPC	7.93327
GCaMP	dHPC	7.05063
GCaMP	dHPC	14.5364
GCaMP	dHPC	10.0507
RCaMP	dHPC	11.6929
RCaMP	dHPC	5.63991
RCaMP	dHPC	7.84148
RCaMP	dHPC	8.09929
RCaMP	dHPC	16.5398
RCaMP	dHPC	12.0305
GCaMP	vHPC	3.70195
GCaMP	vHPC	7.40798
GCaMP	vHPC	6.44623
GCaMP	vHPC	3.36965
GCaMP	vHPC	6.16071
GCaMP	vHPC	5.41334
GCaMP	vHPC	4.32665
GCaMP	vHPC	8.43803
RCaMP	vHPC	2.89152
RCaMP	vHPC	7.26912
RCaMP	vHPC	6.78564
RCaMP	vHPC	3.38953
RCaMP	vHPC	6.05287
RCaMP	vHPC	7.55727
RCaMP	vHPC	4.48576
RCaMP	vHPC	22.2025

## Sheet: Figure 4  Suppl. 1
	PANEL E	frequency	drug	mouse		PANEL F	frequency	drug	mouse		PANEL G	protocol	drug	OFF period	ON period
	Frequency dorsal CA1	0.203631	basal	250012527		Frequency ventral CA1	0.0888573	basal	250012527		% freezing	Direct learning	j60	16.8889	29.2732
		0.125928	basal	250012528			0.0851865	basal	250012528			Direct learning	j60	19.9333	61.1247
		0.159262	basal	250012529			0.0851865	basal	250012529			Direct learning	j60	18.0222	58.5241
		0.0815129	basal	250012530			0.0778078	basal	250012530			Direct learning	j60	28.8889	74.5054
		0.105257	j60	250012527			0.0333313	j60	250012527			Direct learning	saline	20.5556	25.5835
		0.0596455	j60	250012528			0.043857	j60	250012528			Direct learning	saline	19.0889	60.9246
		0.063154	j60	250012529			0.0578912	j60	250012529			Direct learning	saline	20.8222	47.3439
		0.0859597	j60	250012530			0.0842054	j60	250012530			Direct learning	saline	18.2667	27.0282
												Direct learning	j60	30.4222	49.9667
												Direct learning	j60	25.4222	58.1907
												Direct learning	j60	26.5333	51.1669
												Direct learning	j60	25.4222	77.7951
												Direct learning	saline	13.6444	43.9209
												Direct learning	saline	24.3556	40.8535
												Direct learning	saline	24.3778	39.431
												Direct learning	j60	16.3111	48.4108
												Direct learning	j60	10.2222	39.0087
												Direct learning	j60	15.3778	50.3667
												Direct learning	j60	21.4444	67.6817
												Direct learning	saline	22.6667	61.7026
												Direct learning	saline	13.8667	38.3863
												Direct learning	saline	12.0667	40.7868
												Direct learning	saline	22.5778	31.4737
												Mediated learning	j60	18.4889	21.2714
												Mediated learning	j60	21.7333	31.6293
												Mediated learning	j60	23.75	23.062
												Mediated learning	j60	30.8444	38.4085
												Mediated learning	saline	10.8	17.8706
												Mediated learning	saline	20.3778	21.7826
												Mediated learning	saline	17.2222	25.0056
												Mediated learning	saline	29.3111	44.2543
												Mediated learning	j60	16.7111	26.3392
												Mediated learning	j60	10.5333	17.715
												Mediated learning	j60	26.1778	20.3156
												Mediated learning	j60	15.2444	26.5837
												Mediated learning	saline	19.0889	23.9831
												Mediated learning	saline	19.8444	24.2498
												Mediated learning	saline	24.7333	27.495
												Mediated learning	j60	18.4	33.8075
												Mediated learning	j60	12.4222	16.5592
												Mediated learning	j60	12.6889	18.6486
												Mediated learning	j60	12.8444	28.3174
												Mediated learning	saline	15.9333	28.3619
												Mediated learning	saline	8.8	19.2265
												Mediated learning	saline	12.3778	23.9164
												Mediated learning	saline	12.3333	18.693

## Sheet: Figure 4  Suppl. 2
	PANEL B	frequency	drug	mouse		PANEL C	frequency	drug	mouse		PANEL D	protocol	OFF period	ON period
	Frequency dorsal CA1	0.144126	basal	250005215		Frequency ventral CA1	0.188473	basal	250005215		% freezing	Mediated Learning	29.8	43.7431
		0.333338	basal	250005213			0.170373	basal	250005213			Mediated Learning	14.6444	53.9898
		0.31482	basal	250006727			0.14815	basal	250006727			Mediated Learning	16.1333	19.182
		0.359132	basal	250006726			0.203631	basal	250006726			Mediated Learning	12.0222	27.0505
		0.214739	basal	250005214			0.144393	basal	250005214			Mediated Learning	23.0444	41.0758
		0.236786	j60	250005215			0.106992	j60	250005215			Mediated Learning	26.7111	23.3385
		0.410429	j60	250005213			0.0964684	j60	250005213			Mediated Learning	22.2	40.7424
		0.506987	j60	250006727			0.219285	j60	250006727			Mediated Learning	29.0222	54.0787
		0.282439	j60	250006726			0.178936	j60	250006726			Mediated Learning	32.7111	30.8958
		0.263096	j60	250005214			0.175397	j60	250005214			Mediated Learning	14.4444	25.2056
												Mediated Learning	26.2222	26.806
												Direct Learning	40.4	33.7853
												Direct Learning	12.4444	41.2314
												Direct Learning	14.2222	21.5159
												Direct Learning	19.7778	44.5877
												Direct Learning	31.0444	79.4399
												Direct Learning	16.7778	52.2116
												Direct Learning	32	34.1631
												Direct Learning	30.6889	78.6842
												Direct Learning	27.6222	24.2721
												Direct Learning	10.9333	49.7666
												Direct Learning	28.3556	30.0733

## Sheet: Figure 4 Suppl. 3
	PANEL A	drug	protocol	freezing_1	freezing_2	freezing_3	freezing_4	freezing_5	freezing_6	freezing_7	freezing_8	freezing_9	freezing_10	freezing_11	freezing_12	freezing_13	freezing_14	freezing_15	freezing_16	freezing_17	freezing_18	freezing_19	freezing_20	freezing_21	freezing_22	freezing_23	freezing_24	freezing_25	freezing_26	freezing_27	freezing_28	freezing_29	freezing_30	freezing_31	freezing_32	freezing_33	freezing_34	freezing_35	freezing_36	freezing_37	freezing_38	freezing_39	freezing_40	freezing_41	freezing_42	freezing_43	freezing_44	freezing_45	freezing_46
		Paired	T1	6.5	21	17.5	9	13	10	13	7	8.5	27.5	9	5.5	11	10.5	40.5	18.5	8.5	8	10.5	2	6	3	5	5	4	9	2.5	3	5.5	9.5	6.5	6	28.5	11.5	13.5	6	14	27	35.5	22	6.5	14.5	33	32	31.5	52
		Paired	T1	0.5	12	13.5	3	0.5	14.5	8.5	17	18	7.5	6	4	2	33	3	2	3	24.5	4.5	1.5	2	4.5	1.5	1	2	10.5	3	2	13	22	7	4.5	20.5	2.5	22.5	17.5	26	51.5	71.5	25.5	17	49.5	47.5	33.5	52.5	60.5
		Paired	T1	0	17	8.5	6.5	2.5	26	12.5	18	8	11	13.5	5.5	16.5	5.5	17	1	55	21	21	8.5	6	1.5	10	3.5	4.5	13	1.5	8.5	3	6.5	41	17	34	2.5	23.5	23.5	22.5	37	49	24.5	17.5	13	33	25	45	44
		Paired	T1	7	6.5	7	1.5	20	4.5	15	10	7.5	5	16	8.5	10.5	19.5	4	7.5	6	2	38.5	1	2.5	2.5	2.5	1	2.5	16	4	1	5.5	9.5	3	10.5	5.5	6	8.5	13	2	21	13	14.5	5.5	13	21	23	25	14
		Paired	T1	0.8	6	5.6	6	5.6	10	2.8	24	12.4	18.8	14.8	13.6	22.4	15.2	14	16.4	13.2	6	10.8	4.4	3.6	5.2	4	8.8	6.8	4	2.8	7.2	10	8.8	1.6	14	10.4	5.2	19.6	26	32.8	28.4	16.4	6.8	23.2	23.2	41.6	51.2	62.4	48
		Paired	T1	9.5	22.5	20	13	14.5	17.5	37	12	7	6	8	5.5	39.5	23.5	3.5	26	28.5	31	32	4	9	1.5	11	7.5	12.5	12	6.5	10.5	10.5	28.5	23.5	34	43.5	4.5	44.5	24	38.5	40.5	25	29.5	29.5	32.5	35.5	31	52.5	59
		Paired	T1	2.5	0.5	8.5	8.5	13	2	17	4	13	1	10	10.5	15.5	6.5	8	10	9.5	3.5	10	4.5	6.5	2.5	8.5	5	4.5	4	3	2.5	6	8.5	15	26	45.5	5.5	14.5	45	51.5	12.5	40	6	25.5	39.5	51	57	56.5	64
		Paired	T1	0	0	0	0	0	0	0	0	2	0.4	2.8	8	1.2	1.2	8.8	26.4	0.4	4.8	8.8	11.2	25.2	7.2	7.6	8.8	3.2	6	1.6	12.8	10.4	9.2	6.8	4	15.6	16	35.2	43.2	47.2	60.8	54.8	32.4	42.4	43.2	59.2	78	72	86
		Paired	T1	6	5.5	7.5	17.5	21	23.5	16	16.5	38	10.5	13	16	19.5	12	10	11.5	11.5	9	16	5	4.5	3	5.5	14	3	8.5	7.5	6	4	6	22.5	18.5	16.5	10	32	29	32.5	21	31	22	19	40.5	57	40.5	31.5	39.5
		Paired	T1	0	14	10.5	4	7	10	16	1.5	4	6.5	10	4	9	9.5	14.5	24	4	7	11	6.5	9	3.5	3.5	4.5	4.5	11.5	3.5	9.5	12	14	4.5	13	9	3.5	8	19	23	24	25.5	3	12	19.5	16	26.5	37.5	34.5
		Paired	T1	4.8	10.4	3.6	4.4	24.4	7.6	16	4.8	5.2	18	12.8	16	20	3.6	10.4	6.4	12.8	20	7.6	6.8	4	2.4	5.6	6.4	4.8	6.4	3.2	3.6	10.4	10.8	21.6	10.8	7.2	12.4	15.2	14.4	23.2	12.4	13.2	28.8	18.4	38	30	39.2	40.8	21.2
		Paired	T1	1	19	7.5	26	11	12.5	23.5	8	10	10	28.5	15	6	29.5	12.5	43.5	2.5	45.5	31	6	4	2.5	4	3	10	6.5	2.5	2.5	4	9.5	3	8	17.5	6	2.5	17	14.5	18	5.5	36.5	18.5	33	34.5	40	27.5	15
		Paired	T2	4.5	49.5	53	22.5	22	24	29.5	8.5	57	57.5	65	15.5	25	23	32	13	17.5	9.5	36	4.5	19	28.5	46	59	54	48.5	21.5	75	70.5	71	62	67	50	28	38.5	66	70.5	66.5	61	55.5	34.5	68.5	56.5	66	68	64.5
		Paired	T2	6	22.8	20	51.6	17.2	20	16.8	37.6	48	18.8	40.4	41.2	19.6	6.8	24.4	20.4	18.8	28.8	74.8	5.2	35.2	55.2	69.2	84.8	57.2	70.8	6.4	16.8	52	40	43.2	52.4	77.2	33.2	66.8	74	70.8	46.8	76.4	40	43.2	52.4	60.8	45.2	16	18
		Paired	T2	9	22	9.5	47.5	52	36.5	47	41.5	14	64	51	58.5	74	66	53.5	24	34.5	33	33.5	18	26.5	55.5	66	55.5	60	57	7	28.5	62.5	59	55	57	62	9.5	42.5	54.5	69	43	25	47	31	56	22	65.5	35	49
		Paired	T2	8.4	19.2	39.2	29.6	14.8	7.2	16	15.2	14.4	37.2	31.2	28.4	23.6	27.2	45.2	20.8	29.6	18	40.8	1.2	17.2	24.8	22.4	24.8	31.2	62	8	25.2	24	42.8	53.2	40.4	45.2	4.8	47.2	48	54.8	44	49.2	52	11.2	44.8	67.2	54	37.2	37.6
		Paired	T2	2.4	16.8	40.8	28	37.6	23.2	4	16	33.2	22.4	23.2	40	17.2	22.4	26	21.6	30	13.2	24	7.2	46.8	54	50.4	48.8	18.8	30	13.6	46.4	72	56	62	55.6	28.8	56	70	45.2	78.4	54.4	17.6	18.4	34	74.4	87.2	69.2	54.8	62
		Paired	T2	16.4	73.6	70.4	78.4	54.4	52.4	70.4	11.6	25.2	16.8	44.4	64	31.6	36.8	14.4	15.2	10	15.6	34.8	52	70.4	50	66.4	58.8	58.4	54.4	13.6	70.8	80.4	95.6	83.6	94.8	75.6	78	98.8	98.4	92	100	91.6	42	31.2	68	62.8	48.8	40.8	13.2
		Paired	T2	3.5	31.5	20.5	19	5.5	21	19.5	22	29.5	24.5	58.5	56	44	60.5	32	23	3	16.5	26	19	50	64.5	37	12	40	10	52.5	37.5	36.5	1.5	28.5	52.5	19.5	30.5	62.5	89	84	93	84.5	62.5	7	14.5	19	53.5	29	64
		Paired	T2	1.6	8	24.8	25.6	44	26.8	27.6	24	65.2	58.4	62.8	56.4	59.2	54.8	74.4	76.4	65.2	67.6	40	51.6	81.2	85.6	94	59.6	57.6	73.2	18	5.2	15.6	9.2	19.2	59.2	14.4	20	20.4	59.2	58	26.8	52.8	34	29.2	22.4	5.6	46.4	34.4	12.4
		Paired	T2	9.5	18.5	29.5	27	21	32	9	13	25	24.5	26.5	27.5	15	38.5	16	25	24	20	11	13	27.5	23.5	47	52	50	50	15	53.5	69.5	72	74.5	69	50.5	20	70.5	60.5	48.5	8	24	41	17.5	58	77.5	55	56.5	76.5
		Paired	T2	5.2	10.4	21.6	20.8	21.2	10	26	25.6	33.6	44	31.2	16	21.6	34.8	49.6	42	58.4	43.6	28	12	28.4	44.4	46.8	47.6	57.6	11.2	8.4	14.8	25.2	44.4	44.8	60	20.4	10.8	40.8	63.2	62.4	46	52	44	23.6	54	60.4	49.6	68	43.6
		Paired	T2	10	10	6.8	31.6	34.8	22	26	29.6	39.6	29.6	33.6	40.4	28	18.4	37.2	18.4	20	13.6	19.6	11.2	18.8	25.2	20	48.8	44	41.2	20.4	36.8	57.2	58	57.6	55.6	52.4	23.6	71.2	70.4	80.8	68.8	76.8	40.8	32.8	75.6	82.4	74.4	74.4	76
		Paired	T2	6.4	11.2	17.2	28.4	11.6	13.2	14	21.2	11.6	2	15.6	32.8	33.6	46.4	15.2	13.6	34.8	11.6	26	18.8	24	27.6	33.2	19.2	28	42.8	28.4	65.6	51.6	68	55.6	81.6	47.2	15.2	31.2	27.2	25.6	53.2	49.2	40	36.8	47.2	56	60	78.8	57.6
		Unpaired	T1	0	20	13	22.5	12.5	22	26	20	7	16	15.5	21.5	12.5	7.5	24	9	21	27	12.5	11.5	4.5	7.5	6.5	11.5	16	14	4	3.5	11.5	10.5	17.5	22	10.5	12	12	36.5	22	10	8.5	18	33.5	15	21	66	19	53
		Unpaired	T1	0	0	0	0	0	0	0	0	10.4	2.8	13.2	17.6	8.4	33.2	16.8	27.2	12.4	19.2	18.4	28	46.4	34.4	20.4	12.8	11.6	13.2	8.8	7.6	15.6	2	22.8	22.8	12	44.4	16	23.2	32	53.2	18.4	26	38.8	31.6	44.4	46.4	49.6	30.8
		Unpaired	T1	9	23	25	22.5	23	16.5	21.5	31	27	30	17	15.5	18	24.5	45.5	10	30.5	13.5	24.5	5	5.5	11.5	10	18.5	6.5	14.5	3.5	4.5	14	16	13	24	20	16.5	21	34	20.5	36	52.5	34.5	18.5	52.5	24	29	37	60.5
		Unpaired	T1	8	47	36	26.5	15	18	27	19.5	11.5	13	9.5	8	21.5	18.5	44	30.5	21	37	12	5	6.5	2	4.5	19	6.5	17.5	11	12	8	24.5	18	22.5	17.5	20.5	32	49.5	34	49	39.5	14	25	53	54	55.5	61.5	55.5
		Unpaired	T1	12.4	15.2	22	27.2	18	21.6	36	18.8	29.6	16.8	21.6	28	17.2	14	44.4	14.8	26	15.6	44	3.6	7.6	8.8	8	15.2	25.2	35.6	2	4.8	21.2	36	19.2	27.2	48.4	7.2	26.4	48	29.2	23.6	14.8	51.2	13.2	48.8	34	61.6	68.4	47.6
		Unpaired	T1	10.5	19	13	27.5	25.5	10	39.5	22	11.5	35.5	25.5	48	35	5.5	61.5	39.5	42.5	27.5	55	10	6	3.5	8.5	6	15.5	18.5	1	13.5	8.5	8	14	23	31.5	7	17.5	18.5	24	31	31	31.5	25.5	47	51.5	52.5	48.5	60
		Unpaired	T1	0.5	10	9.5	23	9	13	9.5	11	6.5	6.5	13.5	14	6.5	7	5.5	0.5	15	1.5	10.5	2	4.5	3	10	13	6	7	6.5	2.5	6.5	13.5	4.5	13	12	5	3	17	23	19.5	17.5	28	7.5	25	22.5	36.5	41	39.5
		Unpaired	T1	12.4	18.4	12.8	29.2	20.8	16.4	18.8	13.6	18.4	24	12	10.4	11.2	14	8.8	15.6	8	12.4	22	8.8	3.2	6	5.2	13.6	8.8	8.4	7.2	4	9.2	19.2	10.8	23.6	11.6	6.4	10.8	22	16.8	16.4	20.8	24	22.4	35.2	36	38.8	56	51.2
		Unpaired	T1	7.5	9.5	9	19	21.5	7	13	12	15	20.5	23	39.5	26.5	26.5	17	10	28.5	27	27.5	6.5	4.5	6	4.5	15	16.5	8.5	2.5	5	9	4.5	18	11.5	8	12	21	22	24.5	27.5	38.5	3	14.5	19.5	29.5	29	26	66.5
		Unpaired	T1	17.5	25	17.5	24	6	16	20	41	46	27.5	24	15.5	25	27	12.5	27	8	22	26.5	17	1.5	0.5	17.5	20.5	7	8.5	4	5.5	7	8	24	35	42	13	31.5	60	50	16.5	26.5	33	14	40.5	54	58	43.5	27
		Unpaired	T1	4	7.2	16.4	7.6	13.2	26	14	30.8	38	17.6	19.2	19.2	34.4	22	13.6	13.6	9.2	22.8	23.6	10	20.4	10	24	53.6	14.4	27.2	5.2	16.8	4.4	36.8	13.6	47.2	38	13.6	27.6	28.4	48.8	48.4	53.2	26	18.8	43.2	28	43.6	66.8	69.2
		Unpaired	T1	0	0	0	0	0	17.6	14	19.6	1.6	16	24	19.6	14	28	16.4	13.2	30	12.8	19.6	13.2	10.4	6.4	1.6	8	6.4	7.2	5.6	15.2	4	11.2	21.2	15.6	36.4	22	19.6	43.6	44.8	53.6	30.8	39.6	35.6	48	68.4	37.2	61.2	44.8
		Unpaired	T2	2.5	15	14.5	34	46.5	23	16	16	11	11.5	4	34.5	13	15.5	6	20	32	10.5	6	5.5	13	45	22	35	38	41.5	7.5	37	50.5	51.5	51.5	52.5	2.5	25.5	39	49	70.5	44.5	81.5	33.5	16.5	34.5	15	45.5	53	73
		Unpaired	T2	26.8	19.2	41.2	56.4	24.4	30.8	17.6	8.4	48.8	20.8	37.2	33.6	18	17.2	12.4	30.4	40	52	32.8	61.6	38.8	49.2	60.4	68.4	61.6	48.4	34	71.2	28.4	60.8	59.6	64.4	58.8	64	42	36	33.6	9.2	84	58.8	70.8	46.4	67.6	54.8	82.8	80
		Unpaired	T2	41.5	33.5	41.5	6	17.5	24	15	6	10.5	16	34.5	20	6.5	8.5	48.5	21.5	13.5	17.5	56	21.5	17.5	30.5	58	55.5	37.5	51	34	27.5	67	57.5	58.5	61.5	58.5	52	55	64.5	69.5	74.5	78	38	2.5	17.5	40.5	30	68	22.5
		Unpaired	T2	30.8	55.2	62.8	50.4	50.4	64.8	24.4	32.8	28	29.2	46.4	36	48	46.4	20.4	28	16	38	43.2	23.6	56.8	66.4	63.6	30	66.4	53.2	46.8	35.2	22.8	44.8	64.4	45.2	49.2	36.4	45.6	62	73.6	61.6	70.8	46.8	36.8	62.8	74	78	82	78.4
		Unpaired	T2	8	33.6	59.2	43.6	30.8	23.2	18	6.4	15.2	18.8	37.6	43.2	8.8	35.2	40	32.8	13.6	26	35.6	8.4	16.8	60.8	17.2	44.4	62.8	42.8	23.2	42.4	54	49.6	48.8	78.4	51.6	33.2	66	82.4	53.6	84.8	64.8	74.8	17.6	51.6	77.6	56.8	72.4	95.6
		Unpaired	T2	7.6	23.6	14	13.6	24	10	8	27.6	14.4	39.2	19.2	47.6	14	20	16.4	13.6	27.2	38.8	42.8	25.2	49.6	62.8	73.6	47.6	67.6	78	56	66.4	89.2	54.8	79.2	83.6	78.4	43.2	79.2	77.2	89.2	89.2	94	78.8	55.2	84.4	58.8	87.6	39.2	60.8
		Unpaired	T2	48.5	30	41.5	20.5	19.5	5.5	9.5	51.5	55	34	26	27.5	11.5	24.5	18	15	30.5	14.5	28.5	5	8	39.5	47	53	57	34.5	22.5	51	66	73.5	62	54.5	67	35	42.5	64	80	77.5	69.5	56.5	32	67	80	75.5	84.5	81
		Unpaired	T2	20	22.8	7.2	16.4	27.6	21.2	5.2	26.8	28.8	32	20	13.2	20.4	23.2	23.2	16.4	27.6	48	66	11.2	19.2	37.6	26	69.2	48.8	56.4	34.8	50.4	61.2	38.4	44.8	46.8	47.2	36.4	60	67.2	68.8	66.4	75.2	54.4	38	71.6	88	68.8	62.4	75.2
		Unpaired	T2	30	27	10.5	21	15	15	38	52.5	18.5	29.5	50.5	12.5	24	34.5	68.5	36.5	21	26.5	47	32	37.5	45	25.5	52.5	32.5	51	26.5	48	63.5	68	49	54.5	65	28.5	33.5	51	66	65.5	73	13	26	71	69.5	58	67	83
		Unpaired	T2	57.2	44.8	50.8	17.2	11.2	20.8	27.2	18	24.8	36.8	20	10.8	11.6	14	27.6	49.2	45.2	52	64	30.4	48.8	51.2	50	58	78.8	30.4	21.2	72.8	52	56.8	80	70	69.6	12.4	40	42	40	27.2	26.4	28.8	37.2	88.8	70	61.2	58.4	67.6
		Unpaired	T2	2	24.4	39.6	31.6	39.2	3.6	22.4	35.2	34.4	31.2	55.2	48.4	37.6	56	41.6	44	54.4	29.2	25.2	21.6	33.6	9.2	28.4	7.6	25.2	11.6	27.6	41.2	42.8	41.6	54.4	14.8	11.2	21.2	19.6	37.6	8.8	24.4	48.8	52	22.8	53.6	25.6	32	77.2	72.8
		Unpaired	T2	22.4	6.8	6.4	46	39.6	31.6	21.6	4.8	19.6	54.4	9.6	40	40.4	19.2	34.4	26.4	36	35.6	57.2	33.6	62.4	48.8	44.8	54.4	56.8	65.6	51.2	22.8	79.2	61.6	63.2	83.6	64.8	56.4	54.4	75.2	68	55.2	61.6	65.6	41.2	38.8	34.4	64	66	69.6
		No-Shock	T1	0	2	21	9.5	21	2	15.5	18	13	19	21	32	26	22.5	26	25.5	20.5	12	43	33	46	9	16	23.5	10	32.5	46.5	16.5	10.5	9.5	7.5	32.5	35	22.5	17.5	21.5	13	3.5	29	40	36.5	32	30.5	14.5	20.5	26.5
		No-Shock	T1	11.5	11.5	9.5	11	12	4.5	61.5	34	25	27	19	38.5	15	31.5	18.5	32	29.5	16	41	50.5	52	42.5	53.5	26	28.5	38	27.5	51	52	46	32	16	47	56	65	55.5	44.5	20.5	15.5	41	35.5	35.5	19	29.5	36	40
		No-Shock	T1	4	5	11	30	4	6	8.5	13	5	15.5	16.5	12	20.5	16.5	8.5	17	22	6.5	15	40	30.5	18.5	19.5	7	6.5	13	18.5	37.5	12	38	26	26	23	36.5	21	9	22	43	55	22.5	17.5	17	18.5	35	15.5	17
		No-Shock	T1	6.5	10	5.5	17.5	12	6.5	5	22.5	12.5	14.5	13	9.5	8	17.5	9.5	13	19	27	25.5	45	11	11.5	13.5	31.5	22	24.5	18.5	28.5	17	14	25	17	28	16.5	10	28.5	20	6.5	22.5	11.5	22.5	19.5	9	25.5	4	5.5
		No-Shock	T1	0	10.8	7.2	20.8	14	12.8	10.4	24.4	9.2	11.6	4.8	4.4	29.6	4	5.2	16.8	18	28	27.2	32	27.6	8.4	10	8.4	9.6	9.2	25.2	18	51.2	6.4	17.2	6.8	20.4	23.2	7.6	4	12.4	6	16.4	35.6	4	18	16.4	10	17.6	25.6
		No-Shock	T1	3.5	1	16.5	2.5	8.5	8.5	6	46	9.5	22	16.5	7.5	3.5	8.5	8.5	9.5	18.5	18	20.5	20	19	15.5	26.5	27	15.5	37	23.5	33	20.5	49	29.5	27	17.5	9	35.5	16	21.5	14	22.5	27	17.5	15.5	15.5	36	18.5	7
		No-Shock	T1	0	6.5	25.5	23.5	8.5	13.5	15.5	9	9.5	25.5	4.5	14.5	23	16.5	11	29.5	7	8.5	30	6.5	7.5	16	29	15.5	27	20	22	15	17	10.5	17.5	20.5	10	10.5	11.5	19.5	16	7.5	37	18	23.5	23.5	37.5	20	16.5	25
		No-Shock	T1	0	5.2	8.4	7.2	1.2	4.4	10.4	2.8	32.8	22.8	5.2	7.2	6	21.6	5.6	4.8	8	6.4	24.8	23.2	11.2	8.4	12.8	19.2	17.6	29.2	20	12	2	9.6	10	10.4	22.8	28	22.8	16	5.2	14.8	23.6	18.8	11.2	20.8	24.8	3.2	15.6	6.4
		No-Shock	T1	2	23.5	15	8	4.5	6.5	18.5	12	21.5	18	4	29.5	14.5	20	16.5	26.5	6.5	40	16.5	29.5	16	11.5	14.5	8	20.5	30.5	25.5	22	39.5	18.5	17.5	23.5	22	10.5	11.5	31.5	43	14.5	18	29.5	10.5	38	14	44	32	25
		No-Shock	T1	24	17.5	18	9	5	6	4.5	12.5	14.5	15.5	10	8	21	3.5	19.5	26	13.5	19.5	12.5	2	6	29	17	19.5	12.5	18.5	24	26	5.5	14.5	11.5	22	19	16.5	11	11	15	38.5	19	22	13	18	22	7.5	15.5	6.5
		No-Shock	T1	4.8	15.2	15.2	10.4	12	27.6	8.4	15.2	22.4	20	31.2	39.2	25.6	32	29.2	25.2	30.8	18.8	25.6	32	24.4	21.6	46	28	26	36.8	14.8	33.2	23.6	19.2	28	17.6	39.2	25.2	19.6	42.4	12.8	15.6	27.2	21.6	47.6	32	21.2	49.2	14.8	12.4
		No-Shock	T1	0	0	0	0	0	0	0	0	6.4	10	6	18	6	17.6	9.2	10.8	12.4	34	24	14	25.6	49.6	17.2	43.6	21.6	26	30.4	36	22	37.6	26	34	19.2	34	16	36.8	23.6	31.6	29.6	36.4	30	53.6	41.2	42.8	34.4	46.8
		No-Shock	T2	18.5	3.5	16	3.5	43.5	9.5	21	36.5	43.5	27.5	44.5	18	20.5	26.5	21.5	10.5	28	18.5	38.5	33	26.5	17	36	24	39.5	34	33	24.5	23.5	28	46.5	31	41.5	17	13	10.5	35	46.5	23	45.5	15	21	11.5	20	50	8.5
		No-Shock	T2	5.6	26.4	24.4	56.8	29.2	12	36.8	78.8	60.8	55.2	44	53.2	59.2	34	46	41.6	16	42.4	39.2	46.8	43.2	39.6	42.4	29.2	56.4	76.4	78.4	81.2	60.4	18	32.4	32.8	32.8	22.8	19.6	32.4	44.4	59.2	10.8	45.2	20.4	12.8	34.4	71.6	50.8	17.2
		No-Shock	T2	3	9	16.5	29.5	11	13	11	42	37.5	20	37.5	38	26	15.5	43.5	24.5	11	12.5	16.5	47	22	20	16.5	10.5	42	16.5	25.5	35	15	20.5	16.5	5	10	8.5	7.5	22.5	40.5	25	27	15	15	14	11	10	9	8.5
		No-Shock	T2	3.6	9.2	13.2	14	14.4	25.6	18	40	33.2	49.2	31.2	21.6	14.4	39.6	48	22	30.8	53.6	44	12.4	23.2	31.6	38.8	14.8	23.6	41.2	14.8	20.4	15.2	19.6	18	20.8	7.2	10.8	16.4	16	24	13.6	12	21.2	4	25.2	16.8	28.4	4	8.4
		No-Shock	T2	0	18.8	7.2	8.4	29.6	9.6	25.2	31.6	56.8	31.6	25.6	50.4	22	37.2	34	22	17.6	13.2	32	21.2	23.2	10	9.2	22.4	22	24	20.4	19.6	29.6	4.8	25.6	15.2	20.8	19.6	11.2	19.2	42.4	38.8	33.2	21.6	19.6	8.8	19.6	24.4	6.8	8.8
		No-Shock	T2	2.4	19.6	22	15.6	16.4	4.4	64.8	64.4	68.8	58.8	28	34	22.4	63.6	67.2	26	55.2	28.8	32.4	13.2	40.8	30.8	30.8	28	24	34.8	19.6	46.8	13.6	6.8	13.6	8	31.6	14	25.2	28.4	35.2	50.8	22	22.8	16	22.8	48.8	31.6	15.6	48.8
		No-Shock	T2	5	10	14	19.5	13	13	10	11	18	3	12.5	5	29	9	3.5	11.5	0.5	21	17.5	32.5	35	13.5	12.5	1.5	5.5	9.5	9.5	8.5	31	18	17.5	13.5	5.5	15.5	40.5	35	26.5	40.5	35.5	42	27.5	19	29	8	21	14
		No-Shock	T2	0.8	8.4	12	11.2	7.2	9.2	9.6	8	3.2	4	34.8	7.6	17.2	8.8	9.2	1.6	5.2	12.8	27.6	15.2	9.2	8.4	2.8	6.8	4.8	27.2	20.4	10.8	5.6	3.2	21.6	12.4	10.8	12.8	12.8	3.2	2.8	24.4	30	32.8	25.6	35.6	33.6	6.4	16.8	33.2
		No-Shock	T2	10.5	16	6.5	6	14	7.5	10	16	27.5	29.5	6	20	7	44.5	21.5	20.5	25	2.5	14.5	23	20	33.5	27.5	5.5	8.5	15	17.5	11.5	17.5	37	26	26	25.5	32	27.5	28	30.5	46.5	27.5	43.5	35	50.5	41.5	32.5	28	46
		No-Shock	T2	0	6.8	20.4	40	13.2	7.6	26.8	13.6	9.2	25.6	14.8	45.6	30.4	41.6	34.8	30	7.2	30.4	28	21.6	16.8	21.6	29.2	11.2	27.6	30	20	11.6	16.4	26.8	8	22.8	26.8	8	23.6	27.2	11.2	9.6	29.6	34.8	44.4	30.4	10.4	13.6	18	20
		No-Shock	T2	11.2	13.6	20.8	10.4	28.4	26.4	16.4	23.6	13.6	12	32.4	16.4	25.2	19.2	10.8	15.6	18.4	18.4	28.8	19.2	21.6	18.8	32.8	16.4	25.6	23.6	8	21.2	12.4	40.8	16.8	33.2	30.8	21.6	34.4	36	15.6	24.8	43.2	30	33.6	35.2	27.6	33.6	27.6	40
		No-Shock	T2	5.2	14.8	26.8	20	21.6	14.8	15.2	18.4	13.2	34.4	16.8	10.8	9.2	21.6	15.2	15.6	13.6	16.4	18.4	22.8	39.6	9.2	18.4	16.4	8	17.2	6	14	23.6	47.6	24	11.6	12.8	12	24.4	47.2	35.6	41.2	54.8	58.8	48.8	41.6	53.6	42.4	59.6	58.4
[truncated: 233 more columns]
